# Supplementary material for: Regulation of mRNA translation by a photoriboswitch
Source: eLife. 2020 Feb 13;9:e51737. doi: 10.7554/eLife.51737 (PMC7051177; doi:10.7554/eLife.51737)
Supplement: Figure 1—figure supplement 2—source data 1. [file elife-51737-fig1-figsupp2-data1.xlsx]

## Sheet: Figure 1–figure supplement 2
Figure 1–figure supplement 2a						Figure 1–figure supplement 2d									DMSO
Wavelength (nm)	Z	E	Z (372nm 1.5h)	E(342nm 3h)		Wavelength	0 hr, amino-tSS	0.5 hr, amino-tSS	24 hr, amino-tSS	42 hr, amino-tSS	0 hr, amino-cSS	24 hr, amino-cSS	42 hr, amino-cSS		Wavelength	0 hr, amino-tSS	0.5 hr, amino-tSS	24 hr, amino-tSS, #2	42 hr, amino-tSS	0 hr, amino-cSS	24 hr, amino-cSS	42 hr, amino-cSS, #3
190	0.19572	0.259732	-0.369163	-0.558623		220	0.121	0.158	0.103	0.097	0.102	0.057	0.05		220	0.158	0.233	0.529	0.29	0.119	0.271	0.199
191	0.218129	0.313628	-0.105927	-0.453165		223	0.154	0.238	0.226	0.132	0.069	0.11	0.055		223	0.121	0.245	0.227	0.13	0.129	0.145	0.168
192	0.1138	0.210697	0.0975024	-0.357538		226	0.243	0.347	0.547	0.331	0.108	0.206	0.148		226	0.195	0.471	0.233	0.162	0.065	0.077	0.209
193	-0.005546	0.183659	-0.156925	-0.387938		229	0.911	1.019	0.816	1.035	0.625	0.735	0.793		229	0.371	0.251	0.199	0.32	0.12	0.152	0.171
194	-0.101218	0.0087616	0.203868	-0.427244		232	1.09	0.977	0.901	0.967	0.887	1.139	1.207		232	0.153	0.222	0.113	0.49	0.186	0.133	0.176
195	-0.098783	0.149793	0.302555	-0.482296		235	0.884	0.858	0.788	0.763	0.937	0.844	0.849		235	0.207	0.724	0.256	0.2	0.19	0.215	0.145
196	-0.199435	0.0425348	0.169879	-0.489536		238	0.672	0.645	0.676	0.664	0.606	0.565	0.547		238	0.171	0.303	0.215	0.134	0.09	0.174	0.071
197	-0.073811	0.137267	0.490268	-0.415054		241	0.577	0.553	0.552	0.566	0.432	0.412	0.407		241	0.408	0.28	0.24	0.312	0.256	0.218	0.44
198	-0.007086	0.112457	0.292325	-0.428182		244	0.544	0.529	0.511	0.54	0.383	0.369	0.362		244	0.428	0.413	0.307	0.547	0.399	0.353	0.541
199	-0.060899	0.0826019	0.211514	-0.461641		247	0.512	0.504	0.49	0.514	0.354	0.343	0.336		247	0.32	0.344	0.431	0.389	0.164	0.097	0.181
200	-0.331283	-0.02767	0.203987	-0.357151		250	0.496	0.483	0.474	0.498	0.337	0.33	0.323		250	0.433	0.39	0.379	0.355	0.171	0.09	0.112
201	0.0203228	-0.030856	-0.000635629	-0.424473		253	0.456	0.448	0.435	0.46	0.308	0.3	0.294		253	0.444	0.432	0.417	0.397	0.223	0.178	0.198
202	-0.05311	0.0905288	0.223516	-0.530984		256	0.417	0.412	0.403	0.418	0.286	0.273	0.27		256	0.45	0.443	0.447	0.419	0.249	0.229	0.24
203	0.236256	0.0707028	0.432964	-0.633434		259	0.385	0.372	0.366	0.384	0.25	0.242	0.237		259	0.423	0.419	0.415	0.407	0.257	0.241	0.257
204	0.288027	0.0128186	0.119451	-0.548309		262	0.368	0.355	0.347	0.368	0.221	0.213	0.209		262	0.388	0.384	0.386	0.379	0.244	0.229	0.246
205	0.258361	0.110718	0.223904	-0.418689		265	0.348	0.336	0.328	0.347	0.177	0.169	0.168		265	0.359	0.355	0.354	0.35	0.202	0.191	0.207
206	0.248977	0.0083589	0.400618	-0.399898		268	0.341	0.33	0.325	0.341	0.156	0.146	0.147		268	0.345	0.343	0.345	0.341	0.166	0.159	0.175
207	0.0392752	0.031836	0.19823	-0.400765		271	0.344	0.334	0.327	0.346	0.149	0.14	0.14		271	0.345	0.347	0.35	0.34	0.15	0.143	0.16
208	0.0493183	-0.014029	0.143899	-0.305073		274	0.354	0.347	0.338	0.358	0.153	0.145	0.144		274	0.358	0.354	0.36	0.348	0.147	0.14	0.155
209	0.15344	0.0457604	0.0776828	-0.392507		277	0.375	0.362	0.353	0.371	0.163	0.154	0.151		277	0.37	0.368	0.374	0.365	0.153	0.148	0.162
210	0.0263281	0.0863074	0.184828	-0.408051		280	0.394	0.38	0.377	0.389	0.176	0.167	0.166		280	0.391	0.387	0.393	0.385	0.163	0.158	0.173
211	0.237306	0.114985	0.159288	-0.371473		283	0.409	0.393	0.39	0.406	0.189	0.181	0.177		283	0.411	0.411	0.413	0.404	0.175	0.17	0.181
212	0.0591288	0.169469	0.156747	-0.319559		286	0.412	0.4	0.391	0.408	0.2	0.193	0.189		286	0.426	0.425	0.425	0.42	0.187	0.184	0.195
213	0.279197	0.0499719	0.23252	-0.274377		289	0.405	0.393	0.388	0.404	0.206	0.198	0.195		289	0.428	0.422	0.428	0.421	0.196	0.193	0.204
214	0.300111	0.124687	0.224799	-0.305039		292	0.398	0.387	0.379	0.396	0.211	0.201	0.197		292	0.418	0.416	0.419	0.414	0.202	0.198	0.207
215	0.532838	0.27506	0.361996	-0.340542		295	0.378	0.366	0.359	0.374	0.214	0.202	0.198		295	0.405	0.404	0.408	0.401	0.206	0.2	0.21
216	0.0951567	0.185515	0.209935	-0.269934		298	0.344	0.332	0.327	0.341	0.209	0.2	0.198		298	0.394	0.39	0.395	0.387	0.208	0.204	0.213
217	0.206367	0.123453	0.170025	-0.268035		301	0.31	0.299	0.297	0.309	0.203	0.194	0.192		301	0.358	0.352	0.358	0.351	0.203	0.201	0.206
218	0.151366	0.0804553	0.128585	-0.162101		304	0.294	0.286	0.28	0.294	0.195	0.187	0.185		304	0.317	0.315	0.316	0.312	0.198	0.193	0.201
219	-0.020758	0.161063	0.0966956	-0.288282		307	0.288	0.278	0.275	0.286	0.189	0.18	0.18		307	0.294	0.292	0.296	0.291	0.19	0.183	0.193
220	0.0254593	0.157472	0.0447393	-0.217486		310	0.283	0.275	0.27	0.28	0.19	0.184	0.182		310	0.291	0.289	0.293	0.288	0.187	0.181	0.189
221	0.178802	0.100653	0.109103	-0.125355		313	0.28	0.274	0.268	0.278	0.193	0.187	0.185		313	0.288	0.285	0.288	0.282	0.189	0.184	0.189
222	0.289669	0.130523	0.142898	-0.145348		316	0.289	0.283	0.277	0.29	0.201	0.194	0.192		316	0.284	0.282	0.285	0.28	0.19	0.186	0.194
223	0.242495	0.160197	0.224137	-0.0301442		319	0.315	0.308	0.303	0.318	0.217	0.209	0.206		319	0.289	0.287	0.29	0.286	0.197	0.194	0.202
224	0.249583	0.176015	0.227353	-0.0252903		322	0.345	0.338	0.329	0.344	0.241	0.231	0.231		322	0.307	0.304	0.307	0.305	0.211	0.207	0.215
225	0.244821	0.184996	0.267671	-0.0288956		325	0.37	0.362	0.356	0.368	0.273	0.264	0.262		325	0.335	0.331	0.337	0.334	0.234	0.231	0.235
226	0.216242	0.189458	0.337988	0.040439		328	0.385	0.38	0.375	0.385	0.313	0.302	0.299		328	0.357	0.357	0.36	0.356	0.268	0.264	0.267
227	0.308736	0.187781	0.348908	0.176271		331	0.413	0.409	0.4	0.417	0.352	0.341	0.337		331	0.37	0.365	0.369	0.365	0.303	0.296	0.301
228	0.297733	0.23486	0.316174	0.248469		334	0.464	0.456	0.449	0.466	0.394	0.384	0.379		334	0.385	0.381	0.382	0.377	0.341	0.334	0.334
229	0.280573	0.265209	0.310086	0.316464		337	0.521	0.516	0.502	0.518	0.438	0.426	0.42		337	0.418	0.415	0.418	0.412	0.376	0.369	0.367
230	0.29385	0.238217	0.312168	0.326833		340	0.552	0.542	0.531	0.549	0.487	0.473	0.47		340	0.475	0.468	0.472	0.462	0.415	0.413	0.411
231	0.300976	0.221133	0.325514	0.368424		343	0.524	0.508	0.5	0.517	0.538	0.524	0.516		343	0.526	0.523	0.521	0.516	0.477	0.468	0.47
232	0.274409	0.231129	0.326913	0.414655		346	0.486	0.475	0.467	0.483	0.569	0.554	0.544		346	0.511	0.51	0.511	0.505	0.526	0.518	0.515
233	0.340262	0.232718	0.315095	0.378836		349	0.478	0.469	0.457	0.478	0.571	0.553	0.547		349	0.463	0.457	0.459	0.453	0.552	0.546	0.54
234	0.270686	0.192641	0.279286	0.48652		352	0.503	0.492	0.48	0.5	0.569	0.552	0.544		352	0.435	0.431	0.431	0.427	0.564	0.553	0.553
235	0.273807	0.26873	0.294268	0.584788		355	0.542	0.53	0.521	0.537	0.565	0.551	0.542		355	0.458	0.452	0.455	0.449	0.561	0.554	0.55
236	0.300365	0.241485	0.314245	0.570536		358	0.526	0.512	0.504	0.518	0.567	0.554	0.543		358	0.502	0.495	0.501	0.495	0.562	0.556	0.548
237	0.342182	0.25987	0.327006	0.732872		361	0.419	0.408	0.401	0.415	0.559	0.545	0.533		361	0.535	0.53	0.533	0.527	0.569	0.56	0.556
238	0.308571	0.284834	0.31315	0.54924		364	0.307	0.3	0.295	0.306	0.529	0.515	0.505		364	0.489	0.479	0.484	0.48	0.567	0.561	0.555
239	0.312212	0.238076	0.31417	0.652961		367	0.209	0.205	0.199	0.208	0.463	0.448	0.444		367	0.348	0.341	0.347	0.34	0.54	0.535	0.529
240	0.321135	0.243754	0.336082	0.989465		370	0.153	0.148	0.143	0.151	0.374	0.36	0.355		370	0.214	0.21	0.213	0.209	0.486	0.476	0.472
241	0.30779	0.246411	0.367241	0.596887		373	0.124	0.119	0.117	0.123	0.289	0.279	0.276		373	0.147	0.144	0.146	0.143	0.409	0.399	0.399
242	0.307329	0.248607	0.377692	0.343131		376	0.105	0.101	0.101	0.106	0.212	0.204	0.201		376	0.114	0.111	0.115	0.11	0.319	0.31	0.312
243	0.314292	0.249594	0.37772	0.289199		379	0.093	0.09	0.09	0.093	0.148	0.141	0.141		379	0.098	0.096	0.101	0.097	0.234	0.227	0.23
244	0.3174	0.253267	0.379988	0.259944		382	0.085	0.082	0.082	0.086	0.102	0.096	0.097		382	0.089	0.088	0.091	0.088	0.165	0.161	0.163
245	0.32031	0.258066	0.381919	0.246603		385	0.079	0.076	0.077	0.08	0.072	0.067	0.069		385	0.086	0.084	0.087	0.084	0.115	0.11	0.116
246	0.323296	0.26024	0.383139	0.237781		388	0.073	0.071	0.072	0.074	0.052	0.048	0.049		388	0.082	0.081	0.084	0.081	0.08	0.076	0.082
247	0.325986	0.259681	0.381803	0.230579		391	0.068	0.066	0.066	0.068	0.037	0.033	0.034		391	0.077	0.076	0.08	0.076	0.052	0.049	0.058
248	0.328102	0.25486	0.379032	0.224761		394	0.065	0.062	0.062	0.064	0.03	0.026	0.027		394	0.073	0.071	0.075	0.072	0.039	0.038	0.045
249	0.329744	0.246533	0.374066	0.21845		397	0.06	0.058	0.058	0.06	0.025	0.021	0.022		397	0.069	0.068	0.071	0.069	0.031	0.029	0.036
250	0.330618	0.236117	0.368368	0.211296		400	0.054	0.053	0.053	0.056	0.021	0.016	0.018		400	0.066	0.064	0.067	0.065	0.026	0.023	0.029
251	0.330952	0.226533	0.363575	0.204634		403	0.052	0.05	0.051	0.053	0.019	0.015	0.018		403	0.06	0.059	0.062	0.059	0.021	0.02	0.025
252	0.331498	0.219481	0.360569	0.198335		406	0.048	0.047	0.048	0.05	0.018	0.013	0.016		406	0.058	0.057	0.059	0.057	0.018	0.019	0.024
253	0.331819	0.214345	0.359164	0.193066		409	0.046	0.045	0.046	0.047	0.017	0.013	0.015		409	0.053	0.053	0.055	0.054	0.019	0.017	0.024
254	0.332205	0.210064	0.3585	0.188723		412	0.044	0.043	0.044	0.045	0.015	0.012	0.014		412	0.051	0.05	0.052	0.052	0.017	0.014	0.022
255	0.332356	0.204687	0.356762	0.184337		415	0.042	0.041	0.042	0.043	0.016	0.012	0.012		415	0.048	0.047	0.051	0.048	0.015	0.013	0.02
256	0.331938	0.197297	0.353043	0.179496		418	0.039	0.037	0.039	0.039	0.013	0.011	0.012		418	0.043	0.042	0.046	0.043	0.015	0.013	0.019
257	0.330308	0.186638	0.347111	0.173425		421	0.037	0.034	0.037	0.038	0.015	0.011	0.013		421	0.041	0.04	0.044	0.041	0.013	0.011	0.019
258	0.327642	0.173096	0.339695	0.165702		424	0.036	0.033	0.037	0.037	0.015	0.012	0.014		424	0.04	0.039	0.043	0.04	0.012	0.013	0.018
259	0.323647	0.158461	0.331696	0.156395		427	0.035	0.032	0.036	0.036	0.013	0.01	0.013		427	0.038	0.037	0.041	0.039	0.012	0.012	0.019
260	0.318648	0.145126	0.324337	0.146169		430	0.032	0.032	0.034	0.034	0.014	0.011	0.013		430	0.036	0.035	0.038	0.035	0.011	0.012	0.017
261	0.31261	0.135236	0.319468	0.135686		433	0.029	0.028	0.03	0.03	0.011	0.01	0.01		433	0.034	0.034	0.037	0.035	0.011	0.01	0.018
262	0.306079	0.129468	0.316568	0.125973		436	0.028	0.027	0.028	0.029	0.01	0.01	0.01		436	0.031	0.031	0.034	0.032	0.012	0.009	0.018
263	0.298486	0.126976	0.31543	0.117324		439	0.027	0.025	0.027	0.029	0.01	0.01	0.01		439	0.028	0.028	0.031	0.028	0.012	0.008	0.017
264	0.290187	0.127076	0.313962	0.109887		442	0.025	0.024	0.028	0.026	0.011	0.01	0.011		442	0.028	0.027	0.032	0.028	0.01	0.007	0.014
265	0.280528	0.128705	0.311335	0.104022		445	0.024	0.021	0.024	0.023	0.009	0.007	0.009		445	0.026	0.025	0.029	0.026	0.01	0.007	0.014
266	0.269259	0.131474	0.307573	0.099761		448	0.023	0.021	0.025	0.024	0.011	0.009	0.011		448	0.024	0.023	0.028	0.025	0.009	0.007	0.012
267	0.258985	0.13555	0.303425	0.0967505		451	0.021	0.021	0.024	0.024	0.011	0.009	0.011		451	0.025	0.024	0.028	0.024	0.009	0.007	0.013
268	0.250272	0.140747	0.29994	0.0952397		454	0.02	0.018	0.021	0.021	0.01	0.007	0.009		454	0.022	0.021	0.025	0.023	0.009	0.006	0.014
269	0.243254	0.146776	0.298008	0.09505		457	0.02	0.018	0.021	0.021	0.011	0.008	0.009		457	0.02	0.019	0.024	0.021	0.009	0.006	0.012
270	0.239211	0.153727	0.29879	0.0959124		460	0.017	0.016	0.017	0.017	0.008	0.004	0.007		460	0.018	0.018	0.022	0.02	0.008	0.009	0.018
271	0.237345	0.161197	0.301505	0.09767		463	0.017	0.016	0.018	0.017	0.007	0.004	0.006		463	0.018	0.017	0.021	0.019	0.008	0.007	0.016
272	0.237349	0.16905	0.306989	0.100254		466	0.017	0.014	0.018	0.018	0.008	0.007	0.008		466	0.017	0.017	0.02	0.019	0.007	0.008	0.012
273	0.239055	0.177332	0.313411	0.103442		469	0.015	0.015	0.018	0.019	0.01	0.008	0.01		469	0.017	0.016	0.02	0.018	0.005	0.008	0.012
274	0.240776	0.185579	0.31913	0.107037		472	0.014	0.014	0.017	0.017	0.008	0.007	0.008		472	0.016	0.015	0.019	0.017	0.008	0.005	0.01
275	0.241812	0.193977	0.323508	0.110733		475	0.014	0.013	0.016	0.016	0.007	0.006	0.008		475	0.015	0.015	0.019	0.018	0.008	0.005	0.012
276	0.239987	0.201721	0.325444	0.114672		478	0.013	0.012	0.016	0.016	0.008	0.007	0.01		478	0.016	0.015	0.019	0.018	0.007	0.007	0.01
277	0.236512	0.209998	0.325243	0.118704		481	0.013	0.013	0.017	0.015	0.009	0.009	0.009		481	0.015	0.014	0.016	0.016	0.007	0.005	0.013
278	0.231266	0.218335	0.323368	0.123222		484	0.011	0.011	0.013	0.011	0.005	0.004	0.004		484	0.014	0.014	0.018	0.015	0.007	0.005	0.013
279	0.226169	0.227938	0.321812	0.127961		487	0.012	0.01	0.013	0.011	0.005	0.004	0.004		487	0.015	0.015	0.018	0.016	0.008	0.007	0.01
280	0.221522	0.238384	0.322346	0.133454		490	0.011	0.01	0.013	0.012	0.006	0.005	0.006		490	0.011	0.012	0.015	0.013	0.008	0.007	0.01
281	0.218764	0.249569	0.324148	0.138993		493	0.01	0.009	0.012	0.012	0.006	0.004	0.007		493	0.01	0.011	0.015	0.011	0.007	0.007	0.012
282	0.217643	0.261232	0.328333	0.145082		496	0.011	0.01	0.011	0.011	0.006	0.004	0.007		496	0.011	0.011	0.012	0.012	0.007	0.006	0.009
283	0.217855	0.2718	0.3331	0.150801		499	0.01	0.009	0.01	0.011	0.006	0.006	0.006		499	0.009	0.01	0.011	0.011	0.006	0.006	0.008
284	0.219022	0.280733	0.337565	0.155925		502	0.011	0.008	0.012	0.011	0.006	0.004	0.007		502	0.011	0.011	0.012	0.012	0.005	0.004	0.008
285	0.220635	0.286857	0.3407	0.160068		505	0.009	0.008	0.01	0.011	0.007	0.004	0.007		505	0.009	0.009	0.011	0.01	0.006	0.005	0.01
286	0.22235	0.289872	0.342477	0.163116		508	0.009	0.008	0.01	0.01	0.006	0.003	0.006		508	0.009	0.01	0.013	0.011	0.007	0.006	0.008
287	0.223937	0.29032	0.343129	0.165483		511	0.01	0.008	0.01	0.01	0.005	0.004	0.006		511	0.011	0.011	0.012	0.011	0.007	0.002	0.008
288	0.225717	0.288815	0.342345	0.166989		514	0.009	0.009	0.011	0.011	0.007	0.006	0.008		514	0.011	0.01	0.012	0.012	0.005	0.004	0.006
289	0.227548	0.286608	0.341698	0.168286		517	0.008	0.008	0.01	0.01	0.006	0.005	0.006		517	0.009	0.009	0.011	0.01	0.005	0.006	0.012
290	0.229346	0.285329	0.341598	0.16973		520	0.008	0.007	0.01	0.01	0.007	0.004	0.005		520	0.007	0.007	0.009	0.007	0.004	0.004	0.01
291	0.230775	0.286381	0.342646	0.171752		523	0.008	0.007	0.01	0.011	0.007	0.005	0.005		523	0.008	0.009	0.009	0.007	0.006	0.002	0.009
292	0.231691	0.289492	0.344594	0.174529		526	0.009	0.006	0.011	0.011	0.008	0.004	0.007		526	0.009	0.009	0.012	0.009	0.005	0.005	0.012
293	0.23228	0.29463	0.346865	0.177658		529	0.008	0.006	0.009	0.009	0.007	0.004	0.006		529	0.008	0.01	0.009	0.009	0.004	0.005	0.012
294	0.231866	0.299309	0.348107	0.180064		532	0.006	0.005	0.008	0.008	0.006	0.004	0.006		532	0.01	0.01	0.01	0.011	0.004	0.004	0.009
295	0.230617	0.302092	0.347664	0.181483		535	0.007	0.007	0.011	0.009	0.009	0.005	0.009		535	0.007	0.007	0.011	0.009	0.003	0.003	0.007
296	0.229341	0.300586	0.343877	0.181321		538	0.007	0.006	0.011	0.009	0.008	0.004	0.008		538	0.005	0.005	0.008	0.006	0.005	0.002	0.003
297	0.227723	0.293698	0.3371	0.179123		541	0.006	0.006	0.011	0.008	0.007	0.006	0.01		541	0.007	0.007	0.011	0.007	0.005	0.005	0.003
298	0.225973	0.280912	0.327188	0.174507		544	0.006	0.006	0.01	0.009	0.007	0.007	0.008		544	0.006	0.005	0.012	0.005	0.008	0.006	0.007
299	0.224099	0.262894	0.314718	0.167934		547	0.006	0.005	0.008	0.008	0.007	0.006	0.006		547	0.008	0.008	0.01	0.006	0.007	0.009	0.013
300	0.22242	0.242079	0.301217	0.159809		550	0.006	0.005	0.007	0.007	0.006	0.005	0.005		550	0.004	0.005	0.008	0.005	0.005	0.005	0.009
301	0.221187	0.221889	0.288667	0.151714		553	0.008	0.006	0.008	0.008	0.006	0.004	0.004		553	0.003	0.004	0.005	0.005	0.003	0.004	0.008
302	0.220449	0.205013	0.2785	0.144575		556	0.007	0.007	0.011	0.01	0.008	0.007	0.008		556	0.003	0.003	0.006	0.004	0.007	0.005	0.011
303	0.220133	0.193505	0.272335	0.139021		559	0.006	0.006	0.01	0.01	0.006	0.007	0.009		559	0.006	0.007	0.009	0.01	0.006	0.005	0.011
304	0.219972	0.187108	0.270098	0.135473		562	0.005	0.005	0.01	0.009	0.007	0.007	0.009		562	0.006	0.005	0.01	0.008	0.007	0.004	0.008
305	0.220573	0.185467	0.270498	0.133852		565	0.006	0.006	0.009	0.009	0.007	0.005	0.006		565	0.004	0.004	0.009	0.007	0.006	0.001	0.01
306	0.221507	0.187208	0.273838	0.133758		568	0.004	0.004	0.006	0.008	0.006	0.007	0.007		568	0.002	0.002	0.006	0.004	0.004	0.001	0.011
307	0.222886	0.190358	0.277829	0.134557		571	0.003	0.004	0.006	0.007	0.006	0.007	0.006		571	0.005	0.005	0.007	0.006	0.003	0.001	0.01
308	0.22473	0.193977	0.281633	0.135626		574	0.004	0.005	0.008	0.008	0.006	0.005	0.008		574	0.007	0.004	0.008	0.006	0.003	0.004	0.007
309	0.226551	0.196616	0.285326	0.136358		577	0.006	0.004	0.008	0.006	0.005	0.003	0.006		577	0.004	0.002	0.006	0.004	0.004	0.007	0.001
310	0.227748	0.197433	0.287089	0.136367		580	0.004	0.003	0.007	0.007	0.006	0.003	0.005		580	0.004	0.003	0.005	0.004	0.004	0.007	0.004
311	0.229236	0.197023	0.287976	0.136355		583	0.004	0.004	0.007	0.008	0.006	0.005	0.009		583	0.006	0.005	0.007	0.006	0.005	0.005	0.01
312	0.229429	0.195715	0.286755	0.136149		586	0.003	0.003	0.006	0.005	0.004	0.003	0.003		586	0.001	0	0.004	0.002	0.006	0.005	0.01
313	0.229199	0.194215	0.285465	0.135681		589	0.004	0.003	0.006	0.005	0.004	0.003	0.005		589	0.001	0.002	0.004	0.002	0.004	0.004	0.007
314	0.229317	0.19321	0.283414	0.136107		592	0.004	0.004	0.006	0.007	0.005	0.004	0.005		592	0.002	0.001	0.004	0.003	0.002	0.003	0.007
315	0.229079	0.193064	0.281998	0.136761		595	0.005	0.004	0.006	0.008	0.005	0.005	0.004		595	0.002	0.002	0.002	0.003	0.007	0.003	0.016
316	0.229063	0.194901	0.28228	0.13804		598	0.003	0.002	0.005	0.005	0.006	0.006	0.006		598	0.002	0.002	0.004	0.002	0.007	0.003	0.013
317	0.229345	0.199108	0.283678	0.14051		601	0.005	0.004	0.008	0.006	0.006	0.009	0.007		601	0.005	0.004	0.006	0.007	0.003	0.005	0.008
318	0.230177	0.206199	0.287444	0.1441		604	0.006	0.005	0.008	0.007	0.006	0.006	0.005		604	0.004	0.002	0.005	0.007	0.003	0.003	0.009
319	0.231482	0.215834	0.292917	0.148823		607	0.004	0.001	0.005	0.005	0.004	0.003	0.006		607	0.004	0.002	0.005	0.003	0.005	0.004	0.009
320	0.23401	0.22817	0.29953	0.154974		610	0.002	0.002	0.006	0.005	0.004	0.004	0.007		610	0.003	0.004	0.006	0.003	0.007	0.004	0.01
321	0.237407	0.242705	0.308518	0.162595		613	0.003	0.004	0.008	0.006	0.007	0.006	0.01		613	0.005	0.004	0.007	0.007	0.007	0.003	0.011
322	0.240758	0.259912	0.318967	0.171605		616	0.003	0.003	0.007	0.007	0.005	0.006	0.008		616	0.004	0.002	0.005	0.004	0.009	0	0.011
323	0.244223	0.278713	0.329352	0.181647		619	0.003	0.002	0.006	0.006	0.004	0.004	0.006		619	0	0.001	0.002	0.002	0.007	0.004	0.01
324	0.247905	0.29863	0.339926	0.192824		622	0.002	0.003	0.004	0.006	0.005	0.006	0.007		622	-0.002	-0.002	0.002	0.001	0.004	0.005	0.004
325	0.251103	0.31773	0.348979	0.204324		625	0.003	0.004	0.005	0.004	0.004	0.004	0.007		625	0	0	0.003	0.003	0.002	0.004	0.002
326	0.253641	0.333827	0.354845	0.215524		628	0.004	0.002	0.006	0.006	0.005	0.002	0.004		628	0.005	0.004	0.006	0.005	0.004	0.01	0.003
327	0.25519	0.345228	0.356926	0.225615		631	0.002	0	0.003	0.004	0.004	0.001	0.003		631	0.001	0.004	0.003	0.003	0.005	0.011	0.007
328	0.25641	0.351711	0.355746	0.23468		634	0.003	0.004	0.005	0.005	0.005	0.003	0.004		634	0.005	0.006	0.008	0.008	0.003	0.005	0.009
329	0.25767	0.355152	0.352388	0.242043		637	0.003	0.003	0.005	0.005	0.007	0.005	0.008		637	0.005	0.002	0.007	0.007	0.004	0.006	0.007
330	0.259945	0.357983	0.349329	0.249106		640	0.001	0.001	0.004	0.004	0.004	0.005	0.007		640	0.006	0.004	0.006	0.007	0.005	0.008	0.008
331	0.262669	0.362887	0.349411	0.256793		643	0.002	0.004	0.005	0.006	0.006	0.004	0.006		643	0.003	0.001	0.005	0.004	0.006	0.004	0.006
332	0.266816	0.371733	0.352724	0.266159		646	0.003	0.004	0.006	0.007	0.006	0.004	0.009		646	0.004	0.002	0.005	0.003	0	0.001	0.002
333	0.271742	0.386638	0.359815	0.276942		649	0.002	0.003	0.005	0.005	0.003	0.004	0.004		649	0.002	0.001	0.005	0	0.004	0.002	0.009
334	0.278048	0.40588	0.371088	0.289234		652	0.004	0.004	0.007	0.007	0.006	0.006	0.005		652	0.003	0.001	0.004	0.001	0.006	0.005	0.009
335	0.285732	0.430581	0.386787	0.303459		655	0.005	0.003	0.007	0.005	0.005	0.002	0.004		655	0.001	0.001	0.003	0.002	0.005	0.005	0.01
336	0.294711	0.458753	0.40536	0.319079		658	0.001	0.002	0.006	0.005	0.006	0.003	0.006		658	0.004	0.005	0.004	0.005	0.006	0.007	0.009
337	0.304396	0.491428	0.428256	0.33716		661	0.003	0.002	0.006	0.002	0.006	0.004	0.004		661	0.003	0.003	0.004	0.003	0.006	0.005	0.008
338	0.315568	0.528371	0.453246	0.35746		664	0.003	0.005	0.005	0.005	0.006	0.007	0.007		664	0.003	0.002	0.005	0.005	0.006	0.008	0.01
339	0.327825	0.567802	0.48071	0.379251		667	0.002	0.002	0.005	0.004	0.006	0.005	0.007		667	0.002	0.001	0.006	0.002	0.006	0.006	0.014
340	0.341108	0.607028	0.508109	0.401836		670	0.001	0.002	0.004	0.005	0.004	0.003	0.006		670	0.003	0.002	0.006	0.003	0.003	0.001	0.002
341	0.355555	0.643512	0.533804	0.424159		673	0.001	0.004	0.004	0.003	0.004	0.004	0.003		673	0.001	0	0.003	0.003	0.002	0.002	0.001
342	0.369474	0.668972	0.553333	0.443527		676	0.004	0.004	0.008	0.005	0.007	0.007	0.009		676	0.001	-0.001	0.004	0.001	0.004	0.001	0.008
343	0.383501	0.677281	0.562602	0.45739		679	0.005	0.005	0.009	0.007	0.007	0.006	0.011		679	0.003	0.002	0.006	0.001	0.005	0.004	0.007
344	0.39696	0.666056	0.560268	0.463824		682	0.003	0.004	0.006	0.005	0.005	0.007	0.007		682	0	0.001	0.005	0.001	0.004	0.004	0.004
345	0.408649	0.636559	0.546519	0.46402		685	0.001	0	0.003	0.004	0.003	0.002	0.004		685	-0.001	-0.001	0.002	0.001	0.003	0.003	-0.003
346	0.418073	0.598428	0.527233	0.458924		688	0.002	0.001	0.003	0.006	0.003	0.002	0.004		688	0.002	0.003	0.003	0.005	0.003	0.003	0.001
347	0.426091	0.559771	0.506588	0.451743		691	0.005	0.003	0.008	0.007	0.007	0.003	0.005		691	0.004	0.003	0.004	0.004	0.003	0.008	0.004
348	0.431639	0.526343	0.488443	0.444648		694	0.004	0.002	0.006	0.004	0.004	0.004	0.003		694	0.006	0.005	0.006	0.005	0.003	0.002	0.003
349	0.434443	0.504356	0.476116	0.43906		697	0.002	0.001	0.003	0.003	0.004	0.003	0.003		697	0.002	0.002	0.002	0	0.004	0.001	0.006
350	0.435404	0.49424	0.470235	0.435968		700	0.005	0.003	0.005	0.005	0.008	0.004	0.004		700	0	0.001	0.001	0.001	0.006	0.005	0.007
351	0.434092	0.494041	0.469664	0.435359		703	0.001	-0.001	0.003	0.002	0.003	0.001	0.005		703	0.004	0.005	0.004	0.002	0.008	0.008	0.009
352	0.432192	0.503643	0.474147	0.436935		706	0.001	-0.001	0.001	0.001	0.002	0.002	0.003		706	0.001	0.001	0.001	0.001	0.006	0.006	0.014
353	0.429634	0.520559	0.48339	0.440872		709	-0.001	-0.001	-0.001	0.002	0.001	0.001	0.001		709	-0.001	0	-0.001	-0.001	0.004	0.008	0.005
354	0.42734	0.544109	0.49604	0.44635		712	0.001	0.001	0.002	0.003	0.001	0.001	0.001		712	0.001	0	0.003	0.001	0.008	0.009	0.01
355	0.425292	0.571916	0.512348	0.454647		715	0.003	0.002	0.004	0.004	0.005	0.003	0.003		715	0.004	0.002	0.005	0.003	0.005	0.008	0.008
356	0.423419	0.603846	0.531618	0.464383		718	0.001	0	0.004	0.003	0.003	0	0.002		718	0.006	0.006	0.005	0.008	0.004	0.01	0.008
357	0.424434	0.638381	0.552408	0.478089		721	0.002	-0.001	0.004	0.002	0.004	0.001	0.002		721	-0.001	-0.001	0.002	0.001	0.003	0.01	0.001
358	0.425092	0.669768	0.573401	0.491471		724	0.001	0.002	0.002	0.001	0.003	0.005	0.002		724	0.003	0.004	0.007	0.008	0.002	0.001	0.003
359	0.426659	0.694097	0.588836	0.503349		727	-0.002	-0.001	-0.002	-0.002	-0.002	-0.002	-0.001		727	0.003	0.002	0.001	0.007	0.002	-0.002	0.006
360	0.428518	0.698266	0.595295	0.51514		730	0.001	0.001	0.004	0.002	0.004	0.002	0.002		730	0.004	0.003	0.004	0.004	0.003	0.003	0.009
361	0.431784	0.686061	0.591266	0.518851		733	0	0.002	0.005	0.004	0.006	0.005	0.005		733	0.003	0.004	0.007	0.002	0.008	0.003	0.012
362	0.43073	0.64505	0.570015	0.510246		736	-0.001	0	0.002	0.001	0	0.003	0.002		736	0.002	0.004	0.006	0.005	0.006	0.003	0.008
363	0.427136	0.585321	0.527341	0.484235		739	0.004	0.004	0.005	0.006	0.005	0.003	0.004		739	0.003	0.004	0.006	0.007	0.001	0	0
364	0.41886	0.502618	0.471914	0.451666		742	0.003	0.003	0.004	0.004	0.001	0	0.003		742	0.003	0.002	0.004	0.005	-0.003	0.003	0.006
365	0.412793	0.412793	0.412793	0.412793		745	0.004	0.003	0.004	0.003	0.002	0.001	0.002		745	-0.002	-0.001	0.001	-0.001	0.003	0.004	0.013
366	0.404642	0.326072	0.357352	0.377		748	0.003	0.004	0.004	0.001	0.003	0.003	0.005		748	0.001	0	0.001	0.003	0.004	0.001	0.004
367	0.393375	0.254154	0.309298	0.343754
368	0.378818	0.195514	0.26923	0.313611
369	0.361428	0.149721	0.234884	0.284984
370	0.34082	0.114019	0.205913	0.259238
371	0.318514	0.0870844	0.181437	0.235147
372	0.295493	0.0675409	0.16258	0.213072
373	0.271546	0.0535948	0.1458	0.192756
374	0.24618	0.0421038	0.129831	0.172297
375	0.221602	0.034191	0.116284	0.152977
376	0.199046	0.0285125	0.104753	0.13535
377	0.175982	0.0241186	0.0941171	0.118436
378	0.156326	0.0210187	0.0845196	0.10386
379	0.138766	0.018975	0.0765187	0.0910086
380	0.121943	0.0176418	0.0702665	0.0783193
381	0.105242	0.0163375	0.0642215	0.0670466
382	0.0917978	0.0149326	0.0585369	0.0574579
383	0.0813379	0.0142633	0.0536321	0.0493015
384	0.0699596	0.0135162	0.0498253	0.0411086
385	0.0607166	0.0127	0.0463699	0.0348236
386	0.0524778	0.0119464	0.0433409	0.029013
387	0.0472441	0.0113762	0.0402899	0.0248238
388	0.0445499	0.0116384	0.0381587	0.0225911
389	0.0395832	0.0114839	0.0362208	0.0181593
390	0.0313129	0.0097117	0.0346373	0.0133138
391	0.0264196	0.0086158	0.0332819	0.0103647
392	0.0258484	0.0086071	0.0317644	0.0101275
393	0.0284672	0.0095386	0.0302599	0.0102358
394	0.0247097	0.0087812	0.029288	0.00783467
395	0.0215244	0.0080151	0.0287534	0.00548524
396	0.0185432	0.0074002	0.0283601	0.00324468
397	0.0170879	0.0065165	0.027342	0.00286639
398	0.0198631	0.0071325	0.026333	0.0042786
399	0.021492	0.0076706	0.0255633	0.00381577
400	0.0177526	0.0068691	0.0257965	0.0018574
401	0.0142279	0.0056786	0.025286	-9.12281e-06
402	0.0130186	0.0055958	0.0245683	-0.000766316
403	0.012804	0.0054511	0.0240368	-0.000858761
404	0.0130539	0.0052362	0.0238166	-0.000322948
405	0.0164051	0.0063614	0.0234932	0.00146147
406	0.0178738	0.0071074	0.0229617	0.00129483
407	0.0135851	0.0058788	0.0227285	-0.0015448
408	0.0108833	0.0050517	0.0221499	-0.00192248
409	0.0108442	0.0047252	0.0218987	-0.00203135
410	0.0099154	0.0046055	0.0217555	-0.00277942
411	0.0102072	0.0045065	0.021276	-0.0026815
412	0.0114918	0.0047894	0.0208556	-0.00130821
413	0.0156918	0.0060524	0.0206354	0.000774831
414	0.0145082	0.005937	0.0213251	-0.000719486
415	0.0112267	0.0047149	0.0209537	-0.0022655
416	0.0100994	0.004439	0.0200929	-0.0027484
