# Supplementary material for: Regulation of mRNA translation by a photoriboswitch
Source: eLife. 2020 Feb 13;9:e51737. doi: 10.7554/eLife.51737 (PMC7051177; doi:10.7554/eLife.51737)
Supplement: Figure 1—figure supplement 5—source data 1. [file elife-51737-fig1-figsupp5-data1.xlsx]

## Sheet: Figure 1–figure supplement 3
Figure 1–figure supplement 3
Wavelength (nm)	0 nM RNA	50 µM RNA
395	0.7	8.6
399	0	14.2
403	0	10.4
407	0	7
411	0	7.1
415	0	10.7
419	0	13.5
423	0	14.2
427	0	15.9
431	0	18.2
435	0	19.7
439	0	20.5
443	0	19
447	0	18.3
451	0	18.4
455	0	18
459	0	17.5
463	0	15.7
467	0	14.2
471	0	13.3
475	0	12.4
479	0	11.2
483	0	10.2
487	0.2	9.3
491	0	8.3
495	0	7.4
499	0	5.9
503	0	4.8
507	0	4.2
511	0	3.9
515	0.1	3.5
519	0.3	3.1
523	0.3	3.5
527	0	3.9
531	0	4.2
535	0	4.3
539	0.3	4.5
543	1.1	4.2
547	1.4	3.5
551	1	2.3
555	0.5	1.4
559	0	1.1
563	0	1.4
567	0	1.3
571	0.9	0.6
575	1.2	0.2
579	0.5	0
583	0	0
587	0	0.2
591	0	0.6
595	0	0.7
599	0.2	0.5
603	0.3	0.6
607	0.5	1
611	0.4	0.9
615	0	0.7
619	0	0.1
623	0	0
627	0.3	0
631	0.5	0
635	0	0.6
639	0	0.1
643	0	0
647	0	0
651	0.5	0
655	0.9	0
659	0.2	0
663	0	0
667	0	0
671	0	0
675	0	0.2
679	0	0
683	0.3	0
687	1.6	0
691	1.4	0
695	0.6	0
699	0.6	0
703	0.8	1.6
707	0.7	2.7
711	0.5	2.7
715	0.4	1.9
719	0.5	0.6
723	1.4	0
727	2.3	0
731	1.8	2.6
735	1.5	4.4
739	1.2	3.1
743	1	0.6
747	1.1	0.1
751	0.5	0.3
