# Supplementary material for: Regulation of mRNA translation by a photoriboswitch
Source: eLife. 2020 Feb 13;9:e51737. doi: 10.7554/eLife.51737 (PMC7051177; doi:10.7554/eLife.51737)
Supplement: Figure 1—figure supplement 6—source data 1. [file elife-51737-fig1-figsupp6-data1.xls]

## Sheet: Figure 1–figure supplement 4
Figure 1–figure supplement 4a					Figure 1–figure supplement 4b				S1 nuclease probing												Figure 1–figure supplement 4c							Kd from Terbium(III) probing
											Raw intensity	Background subtracted				Normalized
										Amino-tSS [µM]	Loop A44-G46	Loop A44-G46	Model	SqDiff		Loop A44-G46	Model
										0	91359	55311	56861.9	2.40532e+06		0.970647	1													A113												U107
										0.1	84422	48374	47239.8	1.2864e+06		0.839357	0.817892												Concentration (µM)	Band 1	Model	Sq Diff band 1									Concentration (µM)	Band 1	Model	Sq Diff band 1
										0.3	74248	38200	35702.3	6.23856e+06		0.646804	0.599532												0.001												0.001
										1	56585	20537	20400.4	18659		0.312513	0.309928												0.1	0.821762	0.817029	2.2401e-05									0.1	0.93601	0.917692	0.000335554
										3	40178	4130	10904.8	4.58982e+07		0.00199316	0.130214												0.3	0.827071	0.82619	7.7722e-07									0.3	0.938387	0.93891	2.73531e-07
										10	39812	3764	6295.73	6.40967e+06		-0.00493378	0.0429819												1	0.850469	0.854008	1.25278e-05									1	0.983587	0.999401	0.000250066
										30	45025	8977	4804.03	1.74136e+07		0.0937277	0.01475												3	0.899848	0.909099	8.55839e-05									3	1.06963	1.10414	0.00119147
										100	43225	7177	4260.93	8.50346e+06		0.0596608	0.00447115												10	0.999921	0.992071	6.1616e-05									10	1.27952	1.23258	0.00220274
										Background	36048			8.81739e+07	Sum														30	1.05762	1.05034	5.31248e-05									30	1.33382	1.30688	0.000726147
																													100	1.07282	1.08079	6.33791e-05									100	1.30022	1.34156	0.00170922
												Baseline	4024.69																			0.00029941												0.00641547
												Amplitude	52837.2																		Kd	5.79823											Kd	3.85359
												Kd [µM]	0.449123																		Max	1.09636											Max	1.35834
																															Amplitude	0.284147											Amplitude	0.452079
																													Normalized	0.033611	0.0169542										Normalized	0.0658132	0.0252935
																													to	0.0522972	0.0491946										to	0.0710698	0.0722267
																													Model	0.134641	0.147097										Model	0.171054	0.206033
																														0.30842	0.340978											0.361374	0.437727
																														0.660607	0.632982											0.825651	0.721835
																														0.863681	0.83803											0.945776	0.886169
																														0.917178	0.945195											0.871444	0.962894
