# Supplementary material for: Regulation of mRNA translation by a photoriboswitch
Source: eLife. 2020 Feb 13;9:e51737. doi: 10.7554/eLife.51737 (PMC7051177; doi:10.7554/eLife.51737)
Supplement: Figure 1—source data 1. [file elife-51737-fig1-data1.xlsx]

## Sheet: Figure 1
Figure 1b
T1 nuclease probing							Normalized
	Amino-tSS [µM]		G42/G72	Model	SqDiff		G42/G72	Model
	0		1.84825	1.84747	6.01119e-07		1.00063	1
	0.1		1.70119	1.74705	0.00210276		0.88121	0.918447
	0.3		1.6343	1.58844	0.00210269		0.826888	0.789651
	1		1.33197	1.2683	0.00405421		0.581384	0.529678
	3		0.832314	0.952143	0.0143589		0.175631	0.272939
	10		0.775455	0.740683	0.00120915		0.129458	0.101221
	30		0.675035	0.660591	0.000208639		0.0479114	0.0361818
	100		0.635916	0.629749	3.80256e-05		0.0161441	0.0111366
					0.024075	Sum
			Baseline	0.616035
			Amplitude	1.23144
			Kd [µM]	1.1262
T1 nuclease probing							Normalized
	Amino-tSS [µM]		G46/G72	Model	SqDiff		G46/G72	Model
	0		1.74313	1.76036	0.000297014		0.982695	1
	0.1		1.57376	1.65162	0.00606207		0.812637	0.890815
	0.3		1.65701	1.49261	0.0270289		0.896229	0.731152
	1		1.19817	1.21191	0.000188722		0.435507	0.449301
	3		0.845226	0.977374	0.0174631		0.0811221	0.21381
	10		0.819842	0.83956	0.000388809		0.0556341	0.075433
	30		0.873711	0.790802	0.0068739		0.109724	0.0264758
	100		0.785881	0.772494	0.000179224		0.0215349	0.00809271
					0.0584818	Sum
			Baseline	0.764434
			Amplitude	0.995927
			Kd [µM]	0.815874
T1 nuclease probing							Normalized
	Amino-tSS [µM]		G80/G72	Model	SqDiff		G80/G72	Model
	0		0.774114	0.823263	0.00241563		-0.165312	0
	0.1		0.834012	0.831369	6.98959e-06		0.036156	0.0272637
	0.3		0.902578	0.846323	0.00316463		0.266775	0.0775617
	1		0.884742	0.88835	1.30149e-05		0.206785	0.21892
	3		0.971435	0.959065	0.000153025		0.498375	0.456768
	10		1.0022	1.04239	0.00161538		0.60185	0.737034
	30		1.09741	1.08897	7.12402e-05		0.9221	0.893711
	100		1.12357	1.11033	0.000175353		1.01009	0.96555
					0.00761526	Sum
			Baseline	0.823263
			Amplitude	0.297311
			Kd [µM]	3.56789
T1 nuclease probing							Normalized
	Amino-tSS [µM]		G77/G72	Model	SqDiff		G77/G72	Model
	0		1.46099	1.46621	2.73382e-05		0.98929	1
	0.1		1.34638	1.40167	0.0030571		0.754551	0.867803
	0.3		1.42121	1.31308	0.0116912		0.90781	0.686338
	1		1.16865	1.17148	7.99024e-06		0.390508	0.396297
	3		0.955662	1.06565	0.0120972		-0.0457544	0.179531
	10		0.979064	1.00807	0.000841605		0.00217919	0.0616007
	30		1.05824	0.988454	0.0048694		0.164344	0.0214129
	100		1.00562	0.981184	0.000597297		0.0565809	0.00652164
					0.0331891	Sum
			Baseline	0.978
			Amplitude	0.488214
			Kd [µM]	0.656445
	Average Kd	1.5416
417	0.0110464	0.0045669	0.0195694	-0.00256108
418	0.0107746	0.004809	0.0196464	-0.00266082
419	0.0092964	0.004254	0.0195784	-0.00315588
420	0.0097933	0.0039689	0.0194703	-0.00169319
421	0.0131416	0.0044641	0.0191129	0.000416608
422	0.0158434	0.0051584	0.0189427	0.00173394
423	0.0177145	0.005992	0.0187415	0.00213778
424	0.0155878	0.0055567	0.0187155	0.000124678
425	0.0119724	0.0042611	0.0186985	-0.00213474
426	0.0079508	0.0032343	0.0184653	-0.00419467
427	0.0120325	0.0041534	0.0179417	-0.000749895
428	0.0126867	0.004765	0.0176905	-0.00043607
429	0.0118494	0.0045272	0.0180178	0.000209216
430	0.0154896	0.0053036	0.0177375	0.00186592
431	0.0175028	0.0063005	0.0177456	0.00182091
432	0.0133657	0.0049619	0.0174513	-0.000949381
433	0.0109186	0.0040228	0.0169788	-0.00129483
434	0.0099316	0.0032708	0.0163912	-0.00118961
435	0.008625	0.0027054	0.0167085	-0.00297647
436	0.0102997	0.0032136	0.0165614	-0.00199546
437	0.0126228	0.0041871	0.0167956	-0.000624608
438	0.0133934	0.0043346	0.0165063	-0.000263953
439	0.0141068	0.004334	0.016191	-0.000437287
440	0.0133486	0.0039069	0.016147	-0.000732258
441	0.0140409	0.0029606	0.0158126	9.79182e-05
442	0.0122652	0.0020726	0.0158507	-0.00185375
443	0.0127916	0.0025748	0.0159157	-0.00111542
444	0.0137987	0.0026875	0.0155043	-0.000930527
445	0.0141354	0.0025841	0.015213	-0.00136112
446	0.0144072	0.0026548	0.0152431	-0.000690901
447	0.0137758	0.0027772	0.0152841	-0.00153993
448	0.0143538	0.0032398	0.0153252	-0.00121577
449	0.0135174	0.0029481	0.0153722	-0.00148763
450	0.0130415	0.0025634	0.0148046	-0.0020131
451	0.0119524	0.0025732	0.0143972	-0.00247532
452	0.0111265	0.0024954	0.0145094	-0.0026596
453	0.0110941	0.002682	0.0146725	-0.00273441
454	0.0109682	0.002682	0.0146865	-0.00249539
455	0.0095205	0.0020106	0.014105	-0.00284997
456	0.0091772	0.0021765	0.0142621	-0.00303425
457	0.0111561	0.0028567	0.0139408	-0.0010473
458	0.0127096	0.0029459	0.0137116	-0.000596024
459	0.0143852	0.0036245	0.0137946	0.000263953
460	0.0133677	0.0033127	0.0138587	-0.000579603
461	0.0123472	0.0033709	0.0136605	-0.000348491
462	0.0099812	0.003156	0.0134113	-0.00152838
463	0.0112906	0.0032	0.0134693	-0.00042269
464	0.0142956	0.0037872	0.0132291	0.000825919
465	0.0162601	0.0043073	0.0129148	0.00286517
466	0.0165558	0.004735	0.0134243	0.00284753
467	0.0155087	0.004747	0.0136445	0.00173212
468	0.0169306	0.0053162	0.0128237	0.0031498
469	0.0160904	0.0057455	0.013127	0.00154662
470	0.0110664	0.004106	0.013118	-0.000732866
471	0.0099583	0.0034356	0.0130599	-0.00153932
472	0.0110979	0.0037436	0.0128437	-4.80468e-05
473	0.0138922	0.0046638	0.01215	0.00149918
474	0.0137882	0.0043498	0.0125434	0.00113184
475	0.0127897	0.0037104	0.0125054	0.000687252
476	0.0146437	0.0046001	0.0127997	0.00168468
477	0.014617	0.0045397	0.013166	0.00182091
478	0.0127811	0.0037083	0.0125594	0.000824094
479	0.0112867	0.0031707	0.0119558	-0.000302877
480	0.0115967	0.0032359	0.0120009	0.00101324
481	0.0118074	0.0033622	0.0125604	0.00129726
482	0.0135202	0.0035875	0.0126605	0.00120543
483	0.0151024	0.0041229	0.0122321	0.00182882
484	0.0154343	0.0041332	0.0122181	0.00235186
485	0.0151005	0.0028181	0.0112732	0.00640117
486	0.0113993	0.0021254	0.0109939	0.00487584
487	0.0125942	0.0034487	0.0139208	0.000680562
488	0.0155754	0.0043329	0.0129658	0.00278854
489	0.0168028	0.004716	0.0121881	0.00377989
490	0.0183468	0.0052607	0.012106	0.00377259
491	0.0167818	0.0044842	0.0119418	0.00269427
492	0.0154886	0.0041566	0.012099	0.00267055
493	0.0181618	0.005068	0.0117096	0.00425731
494	0.0168695	0.0048988	0.0115454	0.0032167
495	0.0143242	0.0038748	0.0123082	0.00196323
496	0.0170012	0.0046295	0.0115454	0.00429137
497	0.017498	0.0051845	0.0114653	0.00373853
498	0.0171118	0.0052356	0.0115294	0.00455107
499	0.0160608	0.0046529	0.0112551	0.00406756
500	0.0151377	0.0040097	0.0118077	0.00257872
501	0.0162859	0.0044352	0.011116	0.00368622
502	0.0173655	0.004821	0.011089	0.00413689
503	0.0170612	0.004642	0.0115504	0.00400978
504	0.0179043	0.0053162	0.0119448	0.00419224
505	0.018918	0.00545	0.0116135	0.00477245
506	0.0155134	0.0041093	0.0115604	0.00262372
507	0.0150423	0.0041865	0.0115684	0.0019833
508	0.0146799	0.004056	0.0114303	0.00334138
509	0.015358	0.0042061	0.0116926	0.00252641
510	0.0181885	0.0051622	0.0113472	0.00425184
511	0.0193834	0.0055485	0.0112281	0.0048953
512	0.0188265	0.0056508	0.011113	0.00458452
513	0.0179453	0.0051883	0.0110239	0.00421778
514	0.0169554	0.004716	0.0112071	0.00352262
515	0.0171871	0.0050327	0.0115574	0.00318021
516	0.0162849	0.00447	0.0108427	0.00321853
517	0.0157728	0.0048123	0.0108017	0.00330854
518	0.0179625	0.0056285	0.011091	0.00439355
519	0.0193357	0.0059572	0.0103903	0.00504917
520	0.0190868	0.0058396	0.0108577	0.00451822
521	0.0182924	0.0054772	0.0105825	0.00410527
522	0.0174417	0.0054674	0.0102221	0.00350133
523	0.0168257	0.0050811	0.0105544	0.00320393
524	0.0174484	0.0049233	0.0105865	0.00359195
525	0.0170879	0.0051355	0.0103072	0.00378901
526	0.0178699	0.0055752	0.0102261	0.00435888
527	0.0184288	0.0054043	0.0106746	0.00409858
528	0.0183458	0.0052585	0.0106535	0.003952
529	0.017128	0.0047606	0.0103382	0.00362115
530	0.0177069	0.0052971	0.0102802	0.00387415
531	0.0178804	0.0054195	0.0103793	0.0041302
532	0.0170698	0.0049804	0.00993583	0.00452187
533	0.0178957	0.004722	0.010102	0.00440632
534	0.0178757	0.0047171	0.010154	0.00330611
535	0.0179749	0.0049799	0.0102321	0.00430353
536	0.0181932	0.0052454	0.010062	0.00414115
537	0.0178461	0.0047274	0.0102612	0.00415149
538	0.0190325	0.0048357	0.0103643	0.00499626
539	0.0178232	0.0043737	0.00996185	0.00399762
540	0.0173244	0.0044635	0.00995485	0.00420318
541	0.0176201	0.0045397	0.00978768	0.00439902
542	0.0185585	0.0046719	0.010143	0.00481624
543	0.0165091	0.0040184	0.00973863	0.00384009
544	0.0163546	0.0039373	0.00979669	0.00344538
545	0.0171881	0.0042627	0.00983773	0.00365156
546	0.0180864	0.004728	0.0100169	0.00461797
547	0.0186119	0.0048172	0.0100419	0.00503214
548	0.0197258	0.0050245	0.00934424	0.00497741
549	0.0187883	0.0049309	0.00959849	0.00445741
550	0.0171747	0.0044608	0.010086	0.00401404
551	0.0171766	0.0044423	0.00991281	0.00421048
552	0.0173664	0.0044129	0.00971361	0.00395139
553	0.0174761	0.0044869	0.00932823	0.00406695
554	0.0179539	0.0048537	0.00966256	0.00387963
555	0.0192022	0.005111	0.00959349	0.00495612
556	0.018918	0.0049244	0.00947838	0.00421048
557	0.0184832	0.0050305	0.0094043	0.00475663
558	0.0185404	0.0048384	0.0093983	0.0043382
559	0.0175419	0.0050017	0.00961551	0.0041004
560	0.0180101	0.0045647	0.0095074	0.00426339
561	0.0176849	0.0043993	0.00933523	0.00362845
562	0.0176668	0.0048656	0.00939729	0.00369048
563	0.0176735	0.0048286	0.00929119	0.00372332
564	0.0172224	0.0043993	0.00913704	0.00335111
565	0.015523	0.0036876	0.00934524	0.00208547
566	0.0143833	0.0033883	0.00951641	0.00161839
567	0.0137577	0.0028132	0.00875666	0.00134166
568	0.0130358	0.0022342	0.00895185	0.000564398
569	0.01513	0.0027484	0.00871462	0.00129726
570	0.0155497	0.0022995	0.00877868	-0.000285848
571	0.0179853	0.0029938	0.00885676	0.00132098
572	0.021616	0.0046104	0.00885076	0.00302452
573	0.0173092	0.0034873	0.00875566	0.0016713
574	0.0157576	0.0024312	0.00855246	-0.000427556
575	0.0220842	0.0046344	0.00917307	0.00218035
576	0.0221243	0.0049108	0.0087937	0.00276117
577	0.0149727	0.0018974	0.00844035	7.05497e-05
578	0.0216751	0.0036816	0.00871462	0.000520608
579	0.021225	0.0037899	0.00946536	0.00183429
580	0.0201635	0.0038111	0.00860852	0.00110386
581	0.0189981	0.0024731	0.00863554	0.00186166
582	0.0195742	0.0023566	0.00850241	-0.00237132
583	0.0145903	0.0016667	0.010115	-0.0028895
584	0.0174065	0.0022979	0.00875266	0.00148154
585	0.0204697	0.0030292	0.00831022	0.000555275
586	0.0164337	0.0022864	0.00932923	-0.00125895
587	0.0146818	0.001258	0.00874765	-0.00117441
588	0.0169964	0.0019007	0.00874265	-0.00121151
589	0.0149736	0.0018441	0.00917808	-0.00157581
590	0.0130157	0.0011187	0.00866057	-0.00104
591	0.0156908	0.0023887	0.00888379	0.000699416
592	0.0184927	0.0037072	0.00876767	0.00315406
593	0.01828	0.0027212	0.00856647	0.00111298
594	0.0172825	0.0027979	0.00858349	0.000222597
595	0.0147047	0.0022913	0.00823715	-6.32515e-05
596	0.0151844	0.0026597	0.00922713	-0.000160561
597	0.0184669	0.0042148	0.00861552	0.00257081
598	0.0194426	0.0046861	0.00872063	0.00385652
599	0.0176067	0.0039727	0.00846637	0.00142438
600	0.0198669	0.0043541	0.00835426	0.00281043
601	0.020709	0.0042932	0.00845236	0.00328969
602	0.0169497	0.0037632	0.00879069	0.00237315
603	0.0136995	0.0014811	0.00844936	0.000517567
604	0.0163078	0.0027343	0.00883073	0.000794293
605	0.0166225	0.0031353	0.0084924	0.00232693
606	0.0178127	0.0040358	0.00845036	0.00165853
607	0.0192041	0.0048112	0.00856047	0.00273441
608	0.0183449	0.0041169	0.00858249	0.00272346
609	0.0172968	0.0040179	0.0085905	0.00319481
610	0.0168438	0.0034133	0.00812704	0.00218948
611	0.0165462	0.0035145	0.0085915	0.00251242
612	0.015708	0.0032686	0.0086946	0.00160014
613	0.0155935	0.0030863	0.00817909	0.00195289
614	0.0181465	0.004032	0.0083943	0.00263528
615	0.0191231	0.0044488	0.00857849	0.00341862
616	0.0171585	0.0040277	0.00855847	0.0028524
617	0.0137463	0.0027549	0.00844035	0.00163907
618	0.0141878	0.0024399	0.00830121	0.00131064
619	0.0196838	0.0044151	0.00837829	0.00478765
620	0.0181046	0.0037278	0.0084944	0.00345207
621	0.0154657	0.0034726	0.00877768	0.00270643
622	0.0160055	0.0037208	0.00881972	0.00326901
623	0.015254	0.0033486	0.00835627	0.00349769
624	0.0140085	0.0027136	0.00837128	0.00236098
625	0.0140219	0.0031745	0.00806998	0.00231111
626	0.0148201	0.0034035	0.00812504	0.00236706
627	0.0163059	0.0037453	0.00815206	0.00369839
628	0.0177794	0.0045152	0.00823314	0.00427982
629	0.0162935	0.0037104	0.00838129	0.00481198
630	0.0152988	0.0033323	0.00844235	0.0037659
631	0.0144482	0.0034449	0.00836527	0.00370812
632	0.012332	0.0027653	0.00781673	0.00270522
633	0.0149345	0.0036348	0.00801393	0.00422204
634	0.0152292	0.0038911	0.00815907	0.00388328
635	0.0158844	0.0042404	0.00831523	0.00447504
636	0.0164051	0.0041642	0.00790482	0.00439537
637	0.0171776	0.0044477	0.00823615	0.00500234
638	0.0166483	0.0043024	0.0078868	0.00526325
639	0.0144625	0.0036598	0.0081921	0.00378597
640	0.0141945	0.0037344	0.00823615	0.00410648
641	0.0145063	0.003952	0.00796688	0.00386868
642	0.0142307	0.0037899	0.00884875	0.00449268
643	0.0145731	0.0038557	0.00804596	0.00458087
644	0.0143785	0.0037273	0.00745738	0.00421413
645	0.0147419	0.0040026	0.00774166	0.00441605
646	0.0148277	0.0040516	0.00791383	0.00416183
647	0.0145731	0.0039014	0.00861752	0.00433577
648	0.0144892	0.0038927	0.00761954	0.00480772
649	0.0162668	0.0047241	0.00742334	0.00533137
650	0.0160275	0.0046322	0.00762454	0.00489712
651	0.0159035	0.0044847	0.00817408	0.00532346
652	0.0157957	0.0044836	0.00814806	0.004947
653	0.0161476	0.0045468	0.00799991	0.00542807
654	0.0150547	0.0045636	0.00784576	0.00351715
655	0.0188713	0.0036762	0.00565259	0.014394
656	0.0235338	0.0009958	0.00487883	0.00269366
657	0.0161314	0.0027566	0.0134763	-0.00652585
658	0.0156288	0.0047149	0.00851943	0.00419224
659	0.0158291	0.0047508	0.00740633	0.00448112
660	0.014864	0.0043764	0.00806197	0.0050887
661	0.0153952	0.004297	0.00787579	0.00513554
662	0.0151405	0.0044907	0.00836627	0.00517811
663	0.014926	0.0044847	0.00754746	0.00466784
664	0.0170832	0.0052803	0.00696789	0.00586049
665	0.0160856	0.0046153	0.00755848	0.0054822
666	0.015583	0.0043492	0.00806798	0.00501815
667	0.0154533	0.0047639	0.00796688	0.00526386
668	0.0148573	0.0045968	0.00759551	0.00496707
669	0.0159283	0.0049706	0.0069719	0.00565128
670	0.0165482	0.0047965	0.00678371	0.00535509
671	0.0164156	0.0048547	0.00740332	0.00568655
672	0.0161266	0.0044276	0.00750442	0.00531677
673	0.0152855	0.0041359	0.00772464	0.0047098
674	0.015892	0.004469	0.00760753	0.00515439
675	0.015872	0.0045669	0.00769561	0.00547794
676	0.0164642	0.0049418	0.00757349	0.00548768
677	0.0162296	0.0048983	0.00727419	0.00549923
678	0.0161123	0.0042807	0.00773966	0.0052298
679	0.0164213	0.0044951	0.00760853	0.00557161
680	0.016284	0.0045076	0.00768961	0.00493058
681	0.0159874	0.0044358	0.00743936	0.00502971
682	0.0165501	0.0048167	0.00739331	0.00525717
683	0.0152483	0.0042078	0.00770662	0.00485881
684	0.0161524	0.0045555	0.0075845	0.00533076
685	0.0186272	0.0050577	0.00761453	0.00655808
686	0.0177746	0.004747	0.00772764	0.00553755
687	0.0156364	0.0045011	0.0072752	0.00504309
688	0.0157328	0.0046235	0.00738631	0.00466906
689	0.0150728	0.0041664	0.00747439	0.0049476
690	0.0156822	0.0043161	0.00744336	0.00527359
691	0.0169878	0.0045985	0.00710703	0.00593652
692	0.0170517	0.0045946	0.00747439	0.00580393
693	0.0165167	0.0043269	0.00757649	0.00583434
694	0.0152473	0.0042426	0.00766158	0.00464655
695	0.0158644	0.0046235	0.00716108	0.00588604
696	0.0162106	0.0047748	0.00693386	0.00544267
697	0.0177774	0.0047639	0.00731524	0.00693516
698	0.01684	0.0045005	0.00751043	0.00543051
699	0.0155725	0.0040886	0.00716609	0.0054822
700	0.0157061	0.0044243	0.00726118	0.0053338
701	0.0152664	0.004624	0.00743936	0.00466115
702	0.0154047	0.0045582	0.00718611	0.0055862
703	0.0163412	0.0046784	0.00711704	0.00554302
704	0.0154266	0.0043661	0.00718611	0.00526143
705	0.0151653	0.0045294	0.00734827	0.00525778
706	0.01583	0.0047269	0.00705298	0.00633731
707	0.0165758	0.0049853	0.00735427	0.00613722
708	0.0162544	0.0048983	0.00709101	0.00583191
709	0.0159502	0.0050365	0.007072	0.00532955
710	0.0142736	0.0046959	0.0069799	0.00451701
711	0.0154572	0.0051877	0.00712305	0.00481928
712	0.0149488	0.0050675	0.00700493	0.00502424
713	0.017334	0.0054984	0.00706699	0.00659579
714	0.014843	0.0044831	0.00721714	0.0049099
715	0.016077	0.0049505	0.00724116	0.00538428
716	0.0154037	0.0049935	0.00710603	0.00493118
717	0.0149651	0.0047976	0.00708	0.00497132
718	0.0166254	0.0053483	0.00669963	0.00601254
719	0.0156012	0.0047546	0.00705598	0.00553633
720	0.0151482	0.0044766	0.00691584	0.00515865
721	0.0146494	0.0043868	0.00685078	0.00508627
722	0.0148668	0.0043852	0.00684577	0.00485759
723	0.0158834	0.004617	0.00692085	0.00569932
724	0.0155478	0.0043433	0.00688381	0.00511546
725	0.0154648	0.0044347	0.00712805	0.00560323
726	0.0151768	0.0043171	0.00669462	0.00506194
727	0.0157719	0.004439	0.00660854	0.00546517
728	0.0170002	0.0048575	0.00680473	0.00634826
729	0.0160666	0.0046284	0.00670063	0.00562148
730	0.0164766	0.0046175	0.00659052	0.00659823
731	0.0176744	0.0047133	0.00681574	0.00692604
732	0.0160198	0.0043901	0.00699192	0.00558498
733	0.0152702	0.0042366	0.00691684	0.00580454
734	0.0144815	0.0037246	0.00646039	0.00565675
735	0.0158195	0.004075	0.00671464	0.00534232
736	0.0163832	0.0046077	0.0067707	0.00604903
737	0.013938	0.0036277	0.00695087	0.00457539
738	0.0142345	0.0039232	0.00661154	0.00478218
739	0.0152874	0.0045533	0.00653546	0.00572426
740	0.0155439	0.0044646	0.00662656	0.00550714
741	0.0152082	0.0044135	0.0066756	0.00499444
742	0.014904	0.0045903	0.00683876	0.00560992
743	0.0154123	0.0045119	0.00675168	0.00536665
744	0.0136976	0.0041615	0.00654748	0.00468183
745	0.01439	0.0043242	0.00645338	0.00482414
746	0.0141659	0.0042807	0.00661554	0.00473839
747	0.0142641	0.004057	0.00686179	0.00517568
748	0.0150471	0.0045489	0.00663356	0.00517203
749	0.0150042	0.0043939	0.00653747	0.00540618
750	0.0138683	0.0038078	0.00656049	0.00495551
751	0.0153456	0.0042448	0.00654447	0.00505708
752	0.0153866	0.0040293	0.00660754	0.00561357
753	0.0181322	0.0046295	0.00649643	0.00818255
754	0.0163317	0.0040375	0.0064704	0.00647294
755	0.0140133	0.003588	0.00672765	0.00505343
756	0.0165854	0.0044363	0.00644237	0.00707687
757	0.0200024	0.0058695	0.00646439	0.00807977
758	0.018508	0.0056562	0.00644638	0.00675879
759	0.0163765	0.0052433	0.00664858	0.00558012
760	0.0143995	0.0043803	0.00653947	0.00510148
761	0.017705	0.0050653	0.00649542	0.00614878
762	0.0164032	0.0044058	0.00653246	0.00617918
763	0.0171003	0.0046589	0.00671965	0.0073913
764	0.0167561	0.0046267	0.00691684	0.00704099
765	0.0157213	0.003292	0.00642335	0.00658424
766	0.0145178	0.0036995	0.00639032	0.00484908
767	0.0154514	0.0043737	0.00647941	0.00572973
768	0.0176258	0.0051839	0.00665158	0.00764552
769	0.0166721	0.0050599	0.00654948	0.0058909
770	0.0142431	0.0042736	0.00623617	0.00430414
771	0.0131598	0.0035407	0.0063703	0.0039739
772	0.0143423	0.003428	0.00638532	0.00490138
773	0.0125418	0.0023441	0.00645539	0.00526265
774	0.0145483	0.0035613	0.00637931	0.00589212
775	0.0147305	0.0042937	0.00607701	0.00526265
776	0.0153952	0.0049326	0.00620614	0.00500417
777	0.0151138	0.0050963	0.00646439	0.00462101
778	0.0135622	0.0041757	0.00655949	0.00471406
779	0.0145969	0.0037273	0.00633326	0.00579116
780	0.0157042	0.0036147	0.00619613	0.00659518
781	0.0154915	0.0039101	0.00624017	0.00631359
782	0.0162888	0.004803	0.0062652	0.00611654
783	0.0158491	0.0053586	0.00641935	0.00543233
784	0.0154428	0.0051546	0.006062	0.00415696
785	0.0147743	0.0043939	0.00661554	0.0054597
786	0.015461	0.0037034	0.00631425	0.00627832
787	0.0138874	0.0028937	0.00624318	0.00596024
788	0.0160418	0.004291	0.00598592	0.00665418
789	0.0182123	0.0062026	0.00644838	0.00583312
790	0.0164022	0.0058173	0.00617311	0.00485516
791	0.0171785	0.0052612	0.00637731	0.00627163
792	0.018198	0.0044923	0.00604097	0.00754335
793	0.0168428	0.0038813	0.00599993	0.00790218
794	0.0169773	0.0050006	0.00631825	0.00754274
795	0.0173006	0.0061487	0.00643537	0.00487523
796	0.0171108	0.0055654	0.00624217	0.00530035
797	0.0157204	0.003557	0.00607901	0.00696253
798	0.0174198	0.0041708	0.00617611	0.00721614
799	0.0174675	0.0057515	0.00624017	0.00610559
800	0.017107	0.0061802	0.00634728	0.00498288
801	0.0165987	0.005314	0.00611705	0.00528028
802	0.0166388	0.0040483	0.00593287	0.00662559
803	0.0159626	0.0038187	0.00604097	0.00718452
804	0.0168209	0.0056176	0.00595689	0.00572426
805	0.0154305	0.0055882	0.00651044	0.00456566
806	0.0167704	0.0050403	0.00599793	0.00631603
807	0.0172443	0.0040489	0.00579373	0.00745395
808	0.0161171	0.0045342	0.00561055	0.00642064
809	0.0156708	0.0055093	0.00629523	0.00418859
810	0.0157871	0.0051845	0.0061701	0.00528454
811	0.016839	0.0038541	0.00625519	0.00724899
812	0.0165854	0.0042513	0.00641535	0.00723743
813	0.0159979	0.0054838	0.00566961	0.00538489
814	0.0158091	0.0058195	0.00622816	0.00429137
815	0.0163794	0.0042426	0.00638331	0.00650213
816	0.0171947	0.0044586	0.00615409	0.00780791
817	0.0178909	0.0060867	0.00579173	0.00597301
818	0.0162525	0.0058951	0.00585579	0.00457357
819	0.0160885	0.0042274	0.00592987	0.00616337
820	0.0171003	0.0046333	0.00573167	0.00782555
821	0.0174961	0.0059566	0.00607501	0.00603079
822	0.0168962	0.005894	0.00653246	0.00486915
823	0.0167561	0.0041604	0.00591285	0.00728365
824	0.0167971	0.0044428	0.00588782	0.00750078
825	0.0165377	0.0057515	0.00644437	0.00558863
826	0.0166159	0.0053026	0.00639332	0.00585563
827	0.0181723	0.0045506	0.00568662	0.0085949
828	0.0182085	0.0054157	0.00587781	0.00713282
829	0.0171013	0.0063669	0.00621214	0.00497741
830	0.0160742	0.0046491	0.00647741	0.00595902
831	0.0169134	0.0042099	0.00577772	0.00762606
832	0.0183191	0.0065883	0.00547241	0.00586293
833	0.0173321	0.0060964	0.00591685	0.0055789
834	0.0171061	0.0044951	0.00609203	0.00746307
835	0.0183945	0.0055953	0.00599293	0.00704463
836	0.0179768	0.0064545	0.00604898	0.00534232
837	0.0165892	0.0049587	0.00598192	0.00634765
838	0.0169811	0.0045783	0.00571465	0.00742779
839	0.0166292	0.0059044	0.00619613	0.00566831
840	0.0165949	0.005283	0.00592786	0.00566831
841	0.0171356	0.0046137	0.00564358	0.00745516
842	0.0184479	0.006294	0.00618312	0.00646929
843	0.0175476	0.0060306	0.00660754	0.00593591
844	0.0174856	0.0047051	0.00529824	0.00769844
845	0.0183983	0.0060997	0.00549844	0.00671439
846	0.0174093	0.0063059	0.00641034	0.00564824
847	0.017148	0.0046959	0.00583577	0.00782981
848	0.0183849	0.0059903	0.00595289	0.00713951
849	0.0177183	0.0065318	0.00552146	0.00556856
850	0.0173531	0.0052035	0.00605299	0.00698868
851	0.0179358	0.0057302	0.00577772	0.00730311
852	0.0164375	0.0058228	0.00598392	0.00552356
853	0.0167351	0.0044923	0.00547241	0.00693151
854	0.0181837	0.0056073	0.00537131	0.00671561
855	0.0167065	0.0057264	0.0059639	0.00553937
856	0.0172977	0.0050985	0.00587481	0.00723439
857	0.017951	0.005857	0.00550845	0.0066633
858	0.0174456	0.0058565	0.00610804	0.00580941
859	0.0176477	0.0051388	0.00584778	0.00778237
860	0.0179348	0.006109	0.00583077	0.00688407
861	0.0177374	0.0059468	0.0064664	0.00648936
862	0.0178986	0.0050724	0.00547041	0.00764674
863	0.0184107	0.0061073	0.00564358	0.00734812
864	0.0170126	0.0055686	0.00600594	0.00619317
865	0.0179052	0.0055387	0.00599193	0.00737366
866	0.018755	0.0062439	0.00562256	0.00717053
867	0.0177393	0.0055719	0.00602496	0.0072131
868	0.0183277	0.0056601	0.00588582	0.00739009
869	0.0180016	0.0061862	0.00587381	0.00622966
870	0.0173626	0.0053292	0.00593487	0.00733596
871	0.0181618	0.0061269	0.00569363	0.006968
872	0.0182104	0.0059501	0.00617411	0.007027
873	0.0182953	0.0051556	0.00624217	0.0077252
874	0.0178862	0.0061057	0.00579173	0.00614999
875	0.0177946	0.0055066	0.00551045	0.00632819
876	0.0186892	0.0061291	0.0058678	0.00711214
877	0.0180588	0.0059316	0.00631625	0.006299
878	0.0180283	0.0056105	0.00560154	0.00738583
879	0.0186911	0.0063125	0.0058668	0.00620899
880	0.0172329	0.0053167	0.00595789	0.00629474
881	0.0184507	0.0058902	0.00595389	0.00681048
882	0.0180769	0.005918	0.00614208	0.00643219
883	0.0178204	0.0054065	0.0053603	0.00705072
884	0.0181532	0.0062325	0.00559954	0.00636103
885	0.0174503	0.0055773	0.00604298	0.00688468
886	0.0184908	0.0057161	0.00575569	0.0071389
887	0.0188475	0.0062118	0.00582276	0.00701362
888	0.0189295	0.005961	0.00598792	0.00675331
889	0.0190182	0.0063359	0.00619012	0.0069309
890	0.0183086	0.0057221	0.00583377	0.00716201
891	0.018466	0.0061552	0.00622416	0.00628987
892	0.0188284	0.0060529	0.00577571	0.00641759
893	0.0187702	0.0060404	0.00580474	0.00702396
894	0.0187092	0.0062455	0.00625819	0.00702517
895	0.0187931	0.0061492	0.00567862	0.0071237
896	0.0193892	0.0066183	0.00571065	0.00697348
897	0.0180616	0.0057052	0.00587781	0.00719486
898	0.0187759	0.0064001	0.00568162	0.00694063
899	0.0187263	0.0059588	0.00588082	0.00728548
900	0.0191736	0.0062619	0.00604598	0.00689137
901	0.0174913	0.0055817	0.00597891	0.0067448
902	0.0188608	0.005863	0.00574568	0.00702274
903	0.0188932	0.0064131	0.00587681	0.00683055
904	0.01929	0.0060932	0.00557451	0.0074509
905	0.0183058	0.0063092	0.00539834	0.0068561
906	0.0175686	0.0053738	0.00595989	0.00716688
907	0.0188122	0.0062891	0.00629122	0.00699416
908	0.0189762	0.0061324	0.00556851	0.00727392
909	0.0189762	0.0065541	0.00533428	0.00720641
910	0.0179043	0.0058217	0.00599793	0.0069157
911	0.0184422	0.0060257	0.00590784	0.00707687
912	0.0180225	0.0058766	0.0057587	0.00673993
913	0.0189972	0.0060458	0.00590784	0.00728609
914	0.0188837	0.0065127	0.00560154	0.00700753
915	0.0193977	0.0063081	0.00553648	0.00816492
916	0.0189114	0.0064621	0.00562757	0.00711762
917	0.0189409	0.0058744	0.00541135	0.00692239
918	0.0190592	0.0067206	0.00571565	0.00648449
919	0.0177212	0.0056633	0.0057607	0.00694185
920	0.0183067	0.0062646	0.00599893	0.00666573
921	0.0186281	0.005974	0.00528623	0.00755004
922	0.019372	0.0065579	0.00600094	0.00720763
923	0.0182552	0.0057923	0.00561756	0.00729095
924	0.0192509	0.0064621	0.00589683	0.00672351
925	0.0188303	0.0060916	0.00560554	0.00711458
926	0.0193062	0.0066134	0.00558653	0.00686765
927	0.0188589	0.0057003	0.00578072	0.00690718
928	0.0202532	0.0065922	0.00612606	0.00678007
929	0.0195627	0.0061166	0.00541235	0.00658302
930	0.0186138	0.0061122	0.00580774	0.00643219
931	0.0182552	0.0060513	0.00562857	0.0064924
932	0.0201702	0.0068152	0.00586981	0.00667242
933	0.0191822	0.0059947	0.00592987	0.00705862
934	0.019722	0.0065965	0.00479174	0.00668884
935	0.0187969	0.0062265	0.00568662	0.00658484
936	0.0201721	0.0068648	0.00626019	0.00665783
937	0.0190125	0.0058755	0.00598492	0.00671682
938	0.0197601	0.0067685	0.00558152	0.00654349
939	0.0191498	0.0061438	0.00573567	0.00645409
940	0.0197191	0.0066591	0.00586981	0.00657147
941	0.0195875	0.0060643	0.00597191	0.00680744
942	0.01999	0.0066879	0.00569163	0.00606485
943	0.0187988	0.0058902	0.00599193	0.00641212
944	0.0192175	0.006424	0.00559353	0.00608796
945	0.0197201	0.0062499	0.00585579	0.00646686
946	0.0205002	0.0072114	0.0064734	0.00561904
947	0.0198545	0.0062912	0.00557251	0.00703065
948	0.0204315	0.0069284	0.00660453	0.0062394
949	0.0195684	0.0061628	0.00533628	0.00668033
950	0.0202904	0.0067081	0.00545339	0.00648632
951	0.0199509	0.0066259	0.00554549	0.00737062
952	0.0201387	0.0065655	0.00635929	0.00608674
953	0.0214453	0.0069235	0.00655048	0.0068561
954	0.0199537	0.0065818	0.00607501	0.00593956
955	0.0200863	0.0067086	0.00561455	0.00655261
956	0.0199528	0.0066493	0.00621214	0.00649483
957	0.0211	0.0070242	0.00656249	0.00651004
958	0.019989	0.0062967	0.00631425	0.00598821
959	0.0200052	0.0063663	0.00567762	0.00640117
960	0.0203142	0.0066058	0.00548443	0.00632393
961	0.0204659	0.006966	0.0071751	0.00534962
962	0.0209265	0.0060932	0.00561856	0.00693516
963	0.0205164	0.0067222	0.00599393	0.00588239
964	0.0187759	0.0063522	0.00561255	0.00645044
965	0.0203505	0.0066471	0.00683276	0.0061877
966	0.0214891	0.0075836	0.00715608	0.00608856
967	0.0205402	0.0061982	0.00615509	0.0061658
968	0.0190554	0.0066656	0.00593187	0.00620716
969	0.020052	0.0063446	0.00660754	0.00653072
970	0.0201368	0.0065753	0.00701094	0.00647476
971	0.0211172	0.0066694	0.0063653	0.00648754
972	0.0195742	0.0063021	0.00568763	0.00617067
973	0.0196304	0.0064153	0.00625118	0.00610377
974	0.0197659	0.0066651	0.00604198	0.00619256
975	0.0204868	0.0072212	0.00564158	0.00576075
976	0.0197363	0.0063527	0.00608202	0.00619439
977	0.02145	0.0076532	0.00676569	0.00588178
978	0.0212507	0.007022	0.00766058	0.00610559
979	0.0204735	0.0071379	0.00649743	0.00575163
980	0.0208731	0.0067293	0.00614408	0.00548403
981	0.0205278	0.0065285	0.0075825	0.00559654
982	0.0217028	0.0071107	0.00669963	0.00563486
983	0.0194921	0.0064567	0.00612506	0.00451336
984	0.0193863	0.0067831	0.00498093	0.00446957
985	0.0208435	0.0071853	0.00489484	0.00565249
986	0.0211802	0.0070748	0.00731724	0.00436496
987	0.0205688	0.0068811	0.00710603	0.00453647
988	0.0197344	0.0066613	0.00709502	0.00480225
989	0.0199175	0.006399	0.00660654	0.00455897
990	0.0218945	0.0063838	0.00696589	0.00418737
991	0.0211649	0.0074301	0.00739832	0.00390335
992	0.0202637	0.0067353	0.00656149	0.00402377
993	0.0191088	0.0066063	0.00676669	0.00369656
994	0.0206003	0.0072141	0.00753045	0.00387537
995	0.0217447	0.0067597	0.00744036	0.00485942
996	0.0228834	0.0073398	0.00770062	0.00381577
997	0.0191488	0.0064382	0.00581175	0.00417521
998	0.021945	0.0070367	0.00620714	0.00448782
999	0.0215797	0.0078371	0.00692185	0.00292295
1000	0.0209789	0.0063168	0.00699292	0.00431205
1001	0.0201883	0.0070139	0.00578472	0.0024735
1002	0.0207787	0.0066014	0.00584278	0.00425792
1003	0.0213747	0.0070574	0.00581675	0.00313034
1004	0.0194016	0.0066379	0.00574969	0.00236281
1005	0.0222683	0.0085527	0.00509204	0.00361142
1006	0.0209522	0.0066292	0.00855346	0.00261399
1007	0.020504	0.0061454	0.00723215	0.00235429
1008	0.0198774	0.006942	0.00502797	0.00334686
1009	0.0184669	0.0063838	0.00492187	0.00202709
1010	0.0212889	0.0067538	0.0056576	0.00265474
1011	0.0221748	0.0072342	0.00615809	0.00172543
1012	0.0204144	0.0063092	0.00512507	0.00337179
1013	0.0205851	0.0077566	0.00539634	0.00256716
1014	0.0207624	0.0068865	0.00561155	0.00145661
1015	0.0235023	0.0069752	0.00749842	0.000976749
1016	0.0203648	0.0058587	0.00743135	0.00216758
1017	0.0189896	0.0069524	0.00555449	0.0015302
1018	0.020462	0.0073719	0.00302299	0.00072131
1019	0.0226936	0.0066237	0.00561856	0.00106798
1020	0.0211945	0.0067412	0.0081841	0.00038255
1021	0.0211105	0.0067222	0.00616009	0.00102358
1022	0.0200071	0.0069605	0.00655548	0.000332679
1023	0.0222807	0.0080009	0.00474069	-0.00121638
1024	0.0205336	0.0069752	0.00840531	-0.00069455
1025	0.0179539	0.0068963	0.00590484	0.000517567
1026	0.0184212	0.0066177	0.00513007	-0.00207514
1027	0.0202703	0.006522	0.00785577	-0.000788819
1028	0.017457	0.0066281	0.005056	-0.00131673
1029	0.0213442	0.0067652	0.00876967	-0.00243397
1030	0.0242987	0.0074459	0.00271368	-0.00428651
1031	0.0211782	0.0064926	0.0077857	-0.00280861
1032	0.0227242	0.0076848	0.0100019	-0.00223509
1033	0.0172796	0.0053162	0.00289286	-0.00278489
1034	0.0256987	0.0082224	0.00220718	-0.00431935
1035	0.020834	0.0073735	0.00757549	-0.00272286
1036	0.0206556	0.0057765	0.00674567	-0.0048582
1037	0.0191498	0.0086544	0.00555149	-0.00456749
1038	0.0198145	0.0071412	0.00573768	-0.00663168
1039	0.0230303	0.0059708	0.00752945	-0.00359621
1040	0.0202904	0.0067276	0.00726819	-0.0069309
1041	0.0186481	0.0065454	0.00442338	-0.00723074
1042	0.019331	0.0071259	0.00469865	-0.00612323
1043	0.0251017	0.0067097	0.00436932	-0.00752328
1044	0.0222416	0.0083361	0.00942833	-0.00822026
1045	0.0156078	0.004352	0.00390887	-0.0102455
1046	0.0214663	0.0089978	0.00436232	-0.00672716
1047	0.0221939	0.0074949	0.00834525	-0.00917451
1048	0.0251894	0.0052748	0.0135644	-0.0106104
1049	0.0217075	0.0050474	0.00479174	-0.0123675
1050	0.0191231	0.0048585	0.00774166	-0.0120756
1051	0.0195923	0.0079166	0.00467462	-0.0117453
1052	0.0244684	0.0092508	0.0057577	-0.0131441
1053	0.0171413	0.0087719	0.000382378	-0.0166795
1054	0.025774	0.0109697	0.00684177	-0.0149444
1055	0.0281754	0.0068267	0.0133602	-0.0166546
1056	0.0107136	0.0053809	0.00629523	-0.0155848
1057	0.015419	0.0053842	-0.000345342	-0.0138144
1058	0.0264292	0.0072016	0.0105064	-0.0173765
1059	0.0242424	0.0090195	0.00580474	-0.0198616
1060	0.0125666	0.0010056	0.0188396	-0.0209861
1061	0.0136347	0.0075134	0.00132931	-0.0201213
1062	0.0220289	0.0099375	-0.00179377	-0.0206297
1063	0.0311995	0.0107232	0.0133132	-0.0274414
1064	0.0208054	0.0058385	0.00432428	-0.0227699
1065	0.0173178	0.0046774	0.0137046	-0.0231768
1066	0.0205622	0.0049826	-0.00420616	-0.0205245
1067	0.0291281	0.0106584	0.00579473	-0.0228867
1068	0.0215397	0.0026788	0.0124213	-0.0311526
1069	0.017374	0.0067222	0.0132621	-0.0246419
1070	0.024394	0.0111487	-0.000590584	-0.0276628
1071	0.0228338	0.0082398	0.00559453	-0.0247392
1072	0.0323839	0.0075319	0.0112551	-0.0286481
1073	0.020256	0.0067864	0.00398294	-0.0340287
1074	0.0197344	0.0058135	0.00490585	-0.0340731
1075	0.0297575	0.0084727	-0.00944734	-0.0273411
1076	0.0266886	0.0066526	0.0191289	-0.0249345
1077	0.0237169	0.0105447	0.0151079	-0.0329759
1078	0.0229979	0.0063478	0.0181349	-0.0335537
1079	0.0259171	0.0083258	0.0260398	-0.0356185
1080	0.013133	0.0055931	0.0206074	-0.0412394
1081	0.0298214	0.0111063	-0.00308605	-0.0273052
1082	0.0336447	0.0069758	0.000627621	-0.0424953
1083	0.0284891	0.0106481	0.0224042	-0.0396088
1084	0.0249023	0.0165824	0.030295	-0.0441203
1085	0.0112324	0.0108413	0.000269266	-0.0449815
1086	0.0308723	0.0152721	-0.0104383	-0.0599801
1087	0.0247335	0.005998	0.00872963	-0.0502807
1088	0.0205841	0.0049326	0.0295192	-0.0381236
1089	0.0257654	0.0116069	0.00152851	-0.0471649
1090	0.0197163	0.009118	-0.017214	-0.051564
1091	0.0249529	0.0107586	0.00568162	-0.0505756
1092	0.0196886	0.0019355	0.0268676	-0.0565943
1093	-0.007029	0.0020938	0.0130759	-0.0500137
1094	0.0235929	0.0020356	-0.00190588	-0.0508554
1095	0.0346479	0.0043922	0.000390386	-0.0596382
1096	0.0135784	0.0082273	0.0269787	-0.0657408
1097	-0.005058	0.0016808	0.018167	-0.0645335
1098	0.0043097	0.0081206	0.0123802	-0.0501949
1099	0.0423803	0.0179884	0.0126345	-0.0631676
1100	0.025857	0.0076684	0.0191189	-0.0463931
