# Supplementary material for: Regulation of mRNA translation by a photoriboswitch
Source: eLife. 2020 Feb 13;9:e51737. doi: 10.7554/eLife.51737 (PMC7051177; doi:10.7554/eLife.51737)
Supplement: Figure 2—figure supplement 1—source data 1. [file elife-51737-fig2-figsupp1-data1.xlsx]

## Sheet: Figure 2–figure supplement 1
Figure 2–figure supplement 1B												Figure 2–figure supplement 1C
Time	7.4 µM amino-tSS		0 µM amino-tSS		quenched toehold oligo ctrl		tRNA ctrl		fluorescein oligo ctrl			amino-tSS (µM)
0	135.5	0.5	203	9	86.5	29.5	78.5	52.5	1077.75	75.25		0.001	1
2	142	2	254	7	87.5	6.5	103.5	18.5	1101.25	59.75		0.2	0.982456
4	140.5	4.5	282.5	39.5	89.5	25.5	104	27	1138.25	95.75		2	0.833333
6	150	30	273.5	25.5	76	42	107.5	17.5	1091.75	84.25		4	0.666667
8	153.5	16.5	310.5	8.5	87	36	87.5	31.5	1090	94		8	0.385965
10	153.5	31.5	334.5	2.5	72	24	112	23	1074.5	55.5
12	174	27	390.5	8.5	62.5	21.5	89	13	1104.25	96.75
14	170	26	404.5	18.5	57.5	38.5	92	14	1104.75	77.25
16	175	22	408.5	11.5	81	37	95.5	17.5	1112	112
18	202	17	445	21	80	15	121	20	1090.5	86.5
20	176	16	479	35	87	14	86	23	1055.5	68.5
22	217.5	45.5	515.5	7.5	85.5	23.5	94	14	1091.25	96.75
24	208	16	513.5	34.5	69	27	104.5	12.5	1078.25	90.75
26	209.5	17.5	543.5	34.5	71.5	30.5	90	16	1082	85
28	211.5	33.5	552.5	23.5	79	13	84	12	1041.5	80.5
30	261.5	32.5	579.5	45.5	77	19	104.5	5.5	1089.5	104.5
32	240	16	631	40	70	34	99	14	1054.25	84.75
34	220.5	35.5	613	89	80.5	20.5	103	19	1075.25	83.75
36	217	28	629.5	99.5	70	31	98.5	14.5	1058	89
38	233	18	621.5	69.5	77.5	19.5	83	25	1065.75	98.25
40	257	23	651	86	84	32	116.5	7.5	1024.75	73.25
42	253.5	36.5	667.5	76.5	72	27	75	19	1028.25	84.75
44	253	43	707	63	73	41	95	13	1065.5	121.5
46	259	24	732.5	75.5	76	13	89.5	4.5	1044.5	105.5
48	267	41	741.5	84.5	72	14	103	31	1052.5	67.5
50	262.5	16.5	763.5	49.5	78	15	109	15	1071	101
52	239	11	744	75	83.5	20.5	97	13	1092.25	95.75
54	262	32	775.5	106.5	72	18	111	19	1058.25	112.75
56	290	53	789.5	104.5	91.5	15.5	82	5	1076.25	117.75
58	267.5	26.5	745	123	64	46	98.5	7.5	1034	88
60	287	45	791	76	46	36	98.5	22.5	1087	120
