# Supplementary material for: Regulation of mRNA translation by a photoriboswitch
Source: eLife. 2020 Feb 13;9:e51737. doi: 10.7554/eLife.51737 (PMC7051177; doi:10.7554/eLife.51737)
Supplement: Figure 2—figure supplement 2—source data 1. [file elife-51737-fig2-figsupp2-data1.xlsx]

## Sheet: Figure 2–figure supplement 2
Figure 2–figure supplement 2
MgCl2 (mM)	no ligand	8.4 µM amino-tSS
0	12.5	7.4805
1	19.2	7.2305
2	24.2	9.8344
5	26.8	10.619
10	65.2	13.397
