# Supplementary material for: Regulation of mRNA translation by a photoriboswitch
Source: eLife. 2020 Feb 13;9:e51737. doi: 10.7554/eLife.51737 (PMC7051177; doi:10.7554/eLife.51737)
Supplement: Figure 2—figure supplement 3—source data 1. [file elife-51737-fig2-figsupp3-data1.xlsx]

## Sheet: Figure 2–figure supplement 3
Figure 2–figure supplement 3
tSS (µM)	Samples (duplicates)
0.01	0.999059	1
5	1.11947	0.852493
10	0.869332	0.878175
15	0.788429	0.749294
30	0.857667	0.851364
