# Supplementary material for: Regulation of mRNA translation by a photoriboswitch
Source: eLife. 2020 Feb 13;9:e51737. doi: 10.7554/eLife.51737 (PMC7051177; doi:10.7554/eLife.51737)
Supplement: Figure 2—figure supplement 4—source data 1. [file elife-51737-fig2-figsupp4-data1.xlsx]

## Sheet: Figure 2–figure supplement 4
Figure 2–figure supplement 4
Time (min)	Luc2-pET + 20 µM tSS		Luc2-pET
0	0	0	0	0
22.5	1.24347e+07	3.91877e+06	8.63488e+06	1.83427e+06
45	38881919	3.25944e+06	3.52709e+07	7.45699e+06
