# Supplementary material for: Regulation of mRNA translation by a photoriboswitch
Source: eLife. 2020 Feb 13;9:e51737. doi: 10.7554/eLife.51737 (PMC7051177; doi:10.7554/eLife.51737)
Supplement: Figure 2—figure supplement 5—source data 1. [file elife-51737-fig2-figsupp5-data1.xls]

## Sheet: Figure 2–figure supplement 5
Figure 2–figure supplement 5
Time (s)	Were-1-Fluc wt			Were-1-Fluc wt + 7 µM amino-tSS			Were-1-Fluc wt + 15 µM amino-tSS			Were-1-Fluc AUG mutant			Were-1-Fluc AUG mutant + 7 µM amino-tSS			Were-1-Fluc AUG mutant + 15 µM amino-tSS
0	1.97905	3.02678	2.4447	2.67753	2.09546	1.86263	2.09546	3.02678	2.4447	3.2596	5.58789	4.77299	3.37602	3.72526	3.14319	2.67753	3.14319	5.00582
30	1.97905	3.14319	2.56112	2.56112	1.97905	3.2596	2.21187	2.79395	2.4447	6.16997	3.49243	5.23865	2.21187	4.65658	2.67753	2.21187	3.37602	3.95809
60	2.67753	4.30733	2.4447	2.09546	1.6298	2.4447	1.6298	1.51339	1.86263	4.42375	7.10128	5.12224	3.14319	5.12224	3.72526	2.32829	2.91036	3.02678
90	2.56112	3.2596	2.91036	1.97905	3.37602	1.97905	2.56112	1.6298	1.97905	5.93714	3.84168	5.23865	1.97905	3.02678	4.07451	4.54016	1.39697	5.00582
120	3.14319	3.84168	2.91036	2.67753	3.14319	1.97905	2.09546	1.28056	2.56112	6.98487	6.05355	5.58789	4.65658	4.30733	3.72526	5.58789	3.02678	3.2596
150	3.84168	3.02678	3.84168	2.21187	2.4447	3.95809	1.97905	1.6298	2.09546	6.51921	8.96391	5.23865	4.07451	4.65658	4.65658	4.19092	4.42375	2.91036
180	4.07451	3.2596	4.65658	3.14319	1.74622	1.6298	2.21187	3.02678	1.51339	7.33411	4.88941	5.00582	3.60885	3.2596	3.84168	2.09546	4.30733	4.19092
210	3.37602	2.21187	3.84168	2.32829	2.32829	1.39697	2.91036	1.97905	1.86263	5.58789	5.00582	4.77299	4.07451	3.95809	4.19092	2.56112	4.30733	4.42375
240	2.67753	4.42375	3.02678	2.56112	2.21187	2.32829	2.4447	2.21187	2.79395	6.51921	6.86845	5.70431	4.19092	4.42375	5.12224	3.37602	3.84168	3.49243
270	2.91036	2.09546	2.79395	4.07451	3.60885	3.02678	2.4447	1.6298	1.86263	6.51921	7.21769	7.33411	5.35506	5.47148	4.77299	3.2596	2.67753	5.58789
300	3.49243	2.56112	2.67753	2.09546	4.19092	2.91036	1.6298	2.4447	1.74622	8.0326	5.23865	7.21769	4.65658	4.65658	4.77299	3.60885	3.49243	4.07451
330	4.77299	2.21187	3.95809	2.09546	2.09546	1.74622	1.86263	2.56112	2.79395	5.35506	5.12224	6.86845	4.88941	4.54016	5.47148	4.77299	2.91036	4.30733
360	2.4447	3.84168	3.49243	3.37602	2.32829	2.67753	3.72526	1.86263	2.67753	6.05355	8.96391	6.05355	4.88941	3.14319	5.12224	3.84168	2.09546	5.23865
390	3.60885	3.2596	4.30733	2.4447	2.79395	1.6298	2.32829	3.37602	1.86263	6.98487	7.21769	6.51921	3.84168	5.82072	5.58789	4.30733	4.42375	5.35506
420	3.84168	3.02678	4.54016	3.49243	3.95809	2.32829	3.2596	2.79395	3.02678	7.45052	7.10128	7.21769	5.47148	5.47148	4.54016	4.19092	4.19092	4.65658
450	2.32829	4.42375	3.84168	1.6298	4.19092	1.74622	2.4447	1.51339	2.56112	8.38184	7.68335	6.75204	5.70431	3.49243	5.00582	4.42375	4.77299	4.65658
480	3.95809	3.2596	1.97905	2.56112	2.79395	2.32829	2.67753	2.67753	1.16414	8.8475	6.98487	8.73108	3.37602	5.35506	6.16997	4.65658	4.42375	5.35506
510	3.2596	4.42375	3.60885	2.79395	2.91036	2.91036	3.14319	1.97905	2.67753	7.91618	5.93714	6.86845	6.75204	5.00582	5.35506	4.42375	4.54016	5.82072
540	2.4447	2.67753	5.12224	2.56112	2.91036	2.79395	2.91036	2.4447	1.74622	7.21769	7.79977	8.8475	5.00582	5.70431	4.77299	4.77299	3.49243	5.23865
570	4.30733	4.65658	3.95809	1.74622	2.21187	2.91036	2.09546	2.91036	1.74622	8.8475	7.68335	9.31315	6.16997	5.00582	4.54016	3.14319	5.35506	4.77299
600	3.60885	3.2596	4.54016	3.02678	2.79395	3.14319	2.21187	2.32829	1.51339	6.16997	6.63562	6.63562	5.12224	5.58789	6.51921	3.2596	5.47148	5.12224
630	2.91036	2.4447	1.74622	3.14319	2.4447	3.2596	1.6298	2.21187	1.97905	8.14901	10.0116	9.08033	7.10128	5.58789	5.58789	6.51921	4.42375	3.95809
660	2.56112	3.14319	3.49243	2.91036	2.32829	3.02678	3.14319	2.21187	2.91036	8.14901	9.89523	9.31315	6.16997	5.93714	5.23865	5.12224	6.40279	6.16997
690	4.54016	3.84168	2.67753	3.84168	2.79395	2.4447	2.4447	2.56112	2.21187	6.98487	8.49825	8.14901	7.33411	4.30733	7.10128	5.12224	5.00582	4.65658
720	3.37602	3.95809	2.79395	2.4447	2.21187	1.97905	4.30733	1.97905	2.79395	11.8743	10.2445	8.26542	4.19092	5.58789	4.77299	3.84168	3.84168	5.82072
750	4.07451	3.72526	4.42375	3.49243	2.21187	2.4447	1.97905	2.4447	1.16414	10.4773	10.2445	7.79977	5.93714	6.63562	7.33411	4.42375	3.2596	6.86845
780	3.2596	6.16997	5.35506	3.2596	1.74622	3.02678	2.21187	3.14319	2.21187	8.0326	11.6414	9.31315	4.65658	7.10128	4.54016	5.12224	5.82072	6.40279
810	4.42375	4.88941	4.07451	3.37602	3.14319	2.79395	2.09546	2.56112	2.56112	13.5041	9.31315	7.91618	4.30733	5.82072	6.63562	4.30733	5.58789	6.05355
840	5.12224	2.91036	4.88941	2.67753	3.14319	3.37602	2.67753	1.97905	1.28056	12.922	9.54598	12.5728	8.26542	6.75204	5.93714	4.30733	7.56694	6.05355
870	5.12224	2.79395	5.58789	3.95809	4.30733	3.02678	2.21187	2.32829	2.09546	13.2712	13.2712	10.4773	7.79977	8.61467	5.70431	3.95809	6.28638	5.12224
900	5.58789	5.70431	5.35506	2.67753	3.14319	2.4447	3.60885	2.21187	1.97905	9.42957	11.2922	9.54598	5.93714	5.93714	3.60885	4.65658	3.60885	4.65658
930	5.00582	3.84168	4.42375	4.19092	3.49243	3.02678	1.39697	1.86263	2.79395	11.4086	11.0594	16.0652	5.58789	6.86845	3.84168	5.12224	4.30733	6.75204
960	4.88941	7.33411	5.23865	3.49243	2.67753	3.95809	2.21187	2.32829	1.28056	11.9907	11.8743	11.8743	7.56694	5.12224	6.05355	5.12224	3.02678	5.58789
990	5.58789	7.21769	4.88941	2.21187	2.67753	2.91036	2.79395	3.02678	3.49243	11.1758	14.901	15.5995	5.00582	5.58789	7.91618	5.12224	5.35506	7.45052
1020	6.51921	5.35506	7.10128	3.60885	2.09546	3.14319	3.72526	2.4447	2.56112	13.5041	16.5308	12.5728	7.21769	5.00582	7.79977	4.19092	5.00582	5.35506
1050	8.96391	6.51921	7.79977	2.91036	3.72526	3.60885	2.09546	2.91036	2.21187	16.1816	11.525	16.9965	7.10128	6.63562	4.42375	4.88941	4.19092	6.05355
1080	5.82072	7.33411	8.26542	2.56112	2.79395	3.2596	1.51339	1.97905	1.51339	17.9278	13.8533	13.9697	5.70431	7.68335	5.58789	4.19092	4.42375	6.51921
1110	7.10128	6.63562	5.82072	2.21187	3.84168	2.32829	2.4447	2.21187	2.91036	16.8801	13.5041	14.7846	6.16997	7.68335	6.86845	4.30733	3.72526	5.35506
1140	7.68335	6.98487	7.56694	4.65658	3.60885	4.54016	2.21187	2.79395	1.04773	17.695	14.901	17.3458	5.93714	9.08033	8.26542	3.60885	4.77299	6.75204
1170	6.05355	7.68335	9.6624	5.82072	2.79395	3.60885	1.51339	1.97905	1.39697	17.1129	20.1397	17.2293	5.58789	7.68335	9.54598	2.91036	5.47148	5.82072
1200	9.08033	8.96391	8.26542	3.49243	3.14319	4.19092	2.32829	2.79395	1.97905	20.8382	15.8324	20.6054	7.10128	8.0326	9.89523	4.77299	4.88941	3.37602
1230	8.0326	7.33411	8.8475	2.67753	3.72526	3.72526	2.32829	2.56112	2.21187	19.4412	21.6531	22.3516	8.8475	6.16997	7.10128	4.88941	5.47148	6.63562
1260	8.96391	10.4773	7.45052	3.49243	5.58789	3.95809	2.32829	3.14319	1.51339	22.0023	20.0233	19.3248	8.96391	8.38184	9.31315	4.42375	4.54016	4.65658
1290	12.2235	10.1281	9.54598	3.84168	3.72526	2.67753	2.32829	2.79395	2.4447	22.8172	20.7218	19.9069	9.31315	8.96391	9.08033	4.54016	3.49243	6.86845
1320	11.0594	7.33411	7.45052	3.02678	4.54016	3.37602	3.2596	2.79395	2.09546	21.5367	20.0233	19.9069	8.49825	9.19674	8.38184	4.07451	5.93714	6.86845
1350	14.0861	11.1758	11.4086	4.77299	5.35506	3.84168	3.37602	2.79395	1.74622	24.2142	22.8172	22.7008	8.8475	9.42957	10.7101	4.88941	3.84168	6.16997
1380	12.3399	11.4086	10.943	3.37602	3.49243	5.58789	2.91036	2.21187	2.21187	25.0291	22.5844	27.5902	8.73108	8.73108	10.943	6.75204	3.37602	9.77881
1410	11.2922	14.5518	11.8743	3.72526	3.84168	3.2596	2.32829	2.32829	1.86263	23.9814	25.3783	30.2678	10.8265	8.26542	12.2235	4.07451	4.88941	6.51921
1440	11.4086	12.3399	13.6205	3.49243	4.77299	3.14319	3.2596	2.56112	1.39697	26.6589	26.3097	28.638	9.42957	8.73108	10.7101	4.30733	4.54016	6.51921
1470	13.1548	11.6414	16.7637	5.35506	4.42375	4.88941	3.02678	2.4447	2.56112	31.7811	29.8021	29.5693	9.42957	10.3609	11.4086	5.70431	4.77299	5.47148
1500	18.0442	13.6205	17.3458	5.93714	5.00582	4.77299	2.4447	4.19092	2.4447	30.0349	28.4051	33.993	10.1281	10.4773	9.77881	4.42375	3.60885	6.86845
1530	13.7369	16.0652	14.319	3.60885	6.75204	6.16997	2.67753	3.2596	2.32829	34.9243	34.6915	31.4319	9.54598	8.8475	11.0594	3.37602	6.05355	8.0326
1560	16.8801	14.6682	18.0442	4.65658	7.10128	5.82072	2.21187	3.37602	4.77299	40.9779	32.596	37.9511	11.6414	13.3877	16.1816	6.75204	6.16997	6.63562
1590	20.3725	19.4412	18.1607	6.63562	6.28638	7.33411	1.74622	1.86263	2.4447	41.6764	39.3481	38.4168	13.0384	12.6892	14.7846	5.23865	4.77299	7.79977
1620	17.4622	19.3248	21.7695	3.72526	6.40279	4.65658	2.79395	2.56112	1.74622	43.0733	39.9302	46.1001	13.7369	15.0175	12.2235	5.70431	4.77299	7.79977
1650	21.6531	15.7159	22.5844	5.58789	5.12224	7.91618	1.74622	2.21187	1.86263	43.1898	45.9837	41.0943	12.8056	13.9697	16.298	3.84168	4.77299	7.10128
1680	20.6054	23.7485	26.4261	6.75204	5.35506	7.33411	2.56112	3.14319	1.39697	46.4494	42.4913	51.3388	16.8801	14.4354	14.7846	3.95809	3.95809	8.49825
1710	22.0023	22.2352	26.3097	5.93714	8.14901	6.86845	3.72526	1.74622	3.14319	44.1211	48.0792	49.9418	14.5518	17.1129	18.1607	6.86845	5.58789	10.3609
1740	27.5902	21.7695	25.844	4.77299	7.79977	8.49825	3.49243	1.74622	2.32829	53.5506	54.7148	52.3865	13.9697	16.4144	20.0233	5.12224	3.60885	9.77881
1770	29.9185	25.9604	28.9872	7.10128	8.96391	7.91618	2.56112	2.56112	1.51339	56.3446	51.5716	55.4133	18.7427	17.8114	16.9965	4.19092	6.16997	8.61467
1800	33.993	28.5215	35.2736	8.73108	10.5937	8.14901	2.79395	2.21187	1.51339	50.8731	52.0373	54.5984	16.6473	18.1607	19.2084	6.28638	4.19092	10.5937
1830	37.6019	32.3632	29.3364	9.77881	11.525	6.75204	2.32829	2.79395	2.56112	60.6519	56.3446	61.5832	17.4622	19.4412	19.092	4.42375	6.51921	11.7579
1860	35.39	36.4377	34.5751	7.91618	11.0594	8.8475	2.79395	3.02678	2.91036	66.8219	63.7951	63.6787	18.8591	18.3935	19.9069	5.00582	6.51921	14.0861
1890	41.56	34.6915	36.0885	6.86845	9.42957	8.96391	3.72526	2.79395	2.56112	66.5891	65.8906	63.7951	16.8801	20.3725	20.9546	6.86845	5.82072	12.4563
1920	38.8824	42.0256	38.8824	8.14901	11.1758	10.4773	3.14319	3.72526	1.97905	73.5739	66.1234	74.3888	22.5844	22.5844	20.7218	4.30733	4.54016	14.7846
1950	37.2526	41.2107	41.2107	10.1281	15.2503	13.1548	3.14319	2.56112	2.32829	82.305	71.2456	73.8068	22.8172	25.6112	25.1455	6.05355	5.93714	13.2712
1980	39.4645	43.0733	48.1956	10.4773	11.525	10.4773	2.32829	2.79395	1.51339	76.0186	76.8335	74.0396	22.8172	21.4203	23.3993	5.70431	5.82072	11.6414
2010	48.7776	44.8196	42.7241	9.6624	12.4563	16.8801	2.4447	3.14319	2.32829	79.1618	76.0186	80.5588	24.6799	29.3364	27.0081	5.12224	6.63562	13.5041
2040	50.9895	44.0047	55.5297	8.8475	14.319	12.6892	2.67753	2.32829	2.21187	72.1769	83.5856	77.7648	25.9604	23.7485	31.6647	6.28638	6.40279	15.0175
2070	55.064	47.1478	56.3446	10.2445	13.8533	12.3399	3.37602	2.79395	2.09546	85.5646	81.3737	83.2363	22.8172	26.8917	29.4529	6.63562	5.93714	14.5518
2100	52.0373	49.9418	55.064	13.5041	17.4622	16.6473	2.56112	3.02678	1.86263	92.3166	84.2841	94.0629	27.3574	27.8231	33.6438	5.12224	7.91618	18.5099
2130	53.3178	59.6042	59.4878	12.922	16.6473	16.298	3.49243	1.86263	1.86263	87.6601	89.9884	95.8091	27.8231	27.0081	32.3632	6.63562	7.79977	13.5041
2160	57.1595	55.9953	62.1653	10.2445	15.8324	15.3667	2.91036	2.91036	3.2596	97.3225	97.4389	104.657	28.7544	34.4587	33.993	6.75204	5.93714	13.8533
2190	54.9476	49.9418	61.6997	13.0384	22.0023	16.1816	1.6298	3.72526	2.67753	96.8568	92.6659	95.8091	30.8498	32.7125	29.3364	7.68335	4.42375	19.674
2220	63.6787	59.0221	77.4156	15.7159	19.2084	16.7637	3.2596	3.49243	1.28056	90.1048	99.3015	101.048	31.1991	34.4587	33.4109	8.96391	5.58789	20.0233
2250	66.4726	66.2398	60.3027	15.4831	24.447	19.2084	3.2596	3.95809	1.6298	101.397	106.868	100.815	34.1094	34.6915	36.4377	8.61467	7.33411	20.9546
2280	58.44	60.7683	72.759	12.5728	18.7427	19.7905	2.91036	1.28056	1.86263	112.34	106.054	111.641	37.369	40.9779	40.0466	6.40279	7.33411	18.9756
2310	66.5891	63.5623	75.3201	14.901	23.3993	23.2829	3.14319	2.4447	2.4447	117.579	118.626	106.636	34.4587	37.369	40.2794	6.40279	6.28638	19.092
2340	77.1828	71.2456	79.5111	14.6682	21.1874	21.5367	3.2596	3.2596	1.39697	109.43	113.155	115.6	37.369	40.8615	38.766	7.56694	9.08033	19.3248
2370	75.3201	73.9232	80.326	16.0652	19.2084	21.4203	2.67753	4.42375	1.28056	108.382	122.352	126.775	37.8347	50.0582	50.6403	5.70431	8.61467	20.9546
2400	69.8487	72.759	84.8661	20.1397	25.6112	22.468	2.21187	3.02678	3.37602	115.367	121.653	125.378	37.8347	49.3597	47.6135	8.61467	8.0326	23.7485
2430	78.6962	79.6275	80.7916	19.4412	22.2352	25.844	3.2596	1.86263	2.4447	118.277	125.029	122.235	47.6135	49.9418	45.7509	8.38184	9.77881	20.2561
2460	80.908	85.5646	90.9197	21.6531	24.6799	25.9604	3.2596	2.4447	1.16414	127.008	124.796	134.575	43.8882	40.7451	42.142	10.4773	9.89523	18.8591
2490	89.057	89.9884	97.2061	22.468	26.5425	27.9395	2.21187	2.4447	1.86263	119.441	127.823	130.85	43.3062	47.4971	53.8999	9.31315	10.7101	24.3306
2520	81.2573	89.2899	88.8242	20.2561	25.4948	27.1246	4.65658	3.95809	2.09546	127.939	137.369	129.104	47.2643	47.2643	53.2014	10.3609	8.61467	25.3783
2550	88.3586	88.5914	100.116	19.092	29.3364	26.3097	4.07451	4.65658	3.37602	128.289	130.384	123.516	46.7986	46.915	50.9895	9.42957	8.26542	27.8231
2580	88.3586	97.6717	101.397	24.0978	29.8021	27.4738	3.14319	2.91036	2.21187	131.665	137.369	127.125	49.4761	52.1537	54.7148	8.96391	7.79977	27.9395
2610	92.2002	90.454	108.964	20.9546	34.2258	29.4529	5.35506	4.42375	3.49243	131.548	136.205	135.972	54.2491	48.4284	56.3446	9.54598	11.4086	26.4261
2640	99.3015	89.5227	111.176	23.0501	31.5483	30.0349	3.2596	4.07451	2.4447	142.841	140.396	128.405	52.1537	54.2491	56.3446	10.4773	8.8475	26.3097
2670	92.3166	105.122	106.286	25.3783	35.2736	31.6647	5.12224	3.2596	2.67753	140.745	135.972	140.396	54.482	59.1385	51.4552	12.3399	12.922	29.9185
2700	95.4598	106.985	109.313	27.5902	38.1839	34.1094	3.72526	3.37602	2.91036	145.867	146.333	133.993	59.837	57.1595	58.9057	11.6414	10.2445	28.0559
