# Supplementary material for: Regulation of mRNA translation by a photoriboswitch
Source: eLife. 2020 Feb 13;9:e51737. doi: 10.7554/eLife.51737 (PMC7051177; doi:10.7554/eLife.51737)
Supplement: Figure 2—source data 1. [file elife-51737-fig2-data1.xlsx]

## Sheet: Figure 2
Figure 2b								Figure 2c																																		Figure 2e
Time	no ligand	5 µM tSS	7.4 µM tSS	11 µM tSS	14.8 µM tSS			ligand (µM)	tSS							cSS				tS				tDHS					C91G mutant			C89G			G69C			G69C/C84G					Time (min)	no ligand		7.4 µM tSS		14.8 µM tSS
0	9846	8757	8526	8551	9168			0.037	1	1	1	1	1	1	1	1	1	1		1	1	1	1	1	1	1	1		1	1		1	1		1	1		1	1				0	0	0	0	0	0	0
10	9037	9141	8750	9689	9785			0.37		0.89	1																																32	1.96239e+06	884120	1.22037e+06	621400	81368	261571
20	10044	9374	9563	9301	9762			4	0.5186	0.6362	0.5856	0.4392	0.3772																														35	3.03267e+06	1.0622e+06	1.07585e+06	352116	106619	114043
30	10636	9542	9756	9054	10757			5	0.2034	0.19264	0.2134					1	1.2	1											1.14414	1					1.2878			0.897167					38	4.8702e+06	1.64386e+06	529747	256984	-218287	359281
40	10753	9443	9712	10555	11090			7.4	0.14206	0.15532	0.12798	0.11984	0.1783	0.13388																													41	7072653	1.6266e+06	77768.7	256160	-945290	99360.2
50	10357	9616	10376	11020	10431			10	0.13562	0.12644										1.02	1	0.92	0.91	1	1	1.2	0.907547		0.935785	0.938592		0.482499			1.10146	1.12599		0.705515					44	12693345	2.92084e+06	865287	534965	98553.3	264092
60	11829	10972	10611	10145	12006			11	0.1001	0.09296	0.10708	0.13246	0.14736	0.10388	0.11166	1	1	1																									47	1.64615e+07	4.19831e+06	630072	568908	-43468.7	334209
70	11454	10309	12153	10664	10817			15	0.08656	0.08202	0.0939	0.11422	0.1165			1	1.18	1											0.612425	0.600286		0.301497			0.839902	0.848313		0.326747					50	2.11494e+07	3.74043e+06	47695	189824	-814695	341243
80	12057	11158	10494	11304	12717			20																						0.199142		0.146515				0.444048		0.265853	0.108795				53	24959505	4.50796e+06	391460	413472	-418731	338057
90	12186	11269	11340	11366	12262			25																						0.114744		0.0989055				0.163889		0.0872265					56	2.93075e+07	5.37503e+06	271710	391117	-797142	115855
100	12933	11798	11942	12041	13821			30												1	1											0.0934022				0.110119							59	33207567	5.21397e+06	1180964	448777	-218507	216904
110	13161	12617	12672	11774	13711																																						62	35373386	5.39072e+06	536307	530539	-933895	62003.9
120	12911	13552	12301	12389	13874																																						65	3.81209e+07	5.48619e+06	1.26318e+06	873686	-642072	249438
130	14293	13505	13381	12415	13395																																						68	39921848	5.02593e+06	928468	377566	-516578	16623.9
140	14933	13317	12994	14359	14306																																						71	4.16547e+07	4.69763e+06	1.71478e+06	562512	-544112	166632
150	15107	13168	15097	13550	14248																																						74	43248855	4.52137e+06	1.68042e+06	688152	-404142	414591
160	14140	13873	14063	14265	14407																																						77	43495865	4.10658e+06	2121480	868619	-427892	259795
170	15479	16085	14085	14187	14402																																						80	4.45591e+07	4.01281e+06	1739874	1.24622e+06	-515325	382085
180	15156	14729	15220	14389	15381																																						83	45580023	4.20391e+06	2.26116e+06	972088	-218285	223958
381	23219	16649	13662	10826	8078																																						86	45983701	3.88833e+06	2.51961e+06	1.23849e+06	-250531	236437
391	25205	16702	14055	11276	9613																																						89	4.60604e+07	4.13832e+06	2428769	1.1446e+06	-440090	286617
401	23297	16672	14632	9561	8757																																						92	4.70041e+07	3.47006e+06	2236598	706771	-282575	148127
411	22759	18080	14915	9538	8284																																						95	4.76077e+07	3.85969e+06	2.84511e+06	1.2916e+06	-247393	354903
421	23395	17083	15084	11041	8542																																						98	4.771e+07	4.04089e+06	3.41948e+06	1.19808e+06	-149451	248812
431	25987	17108	16031	11211	8530																																						101	4.78538e+07	3.87407e+06	2.69947e+06	865584	-576909	122791
441	23557	18003	16101	11920	9198																																						104	4.90802e+07	3.64942e+06	3.71555e+06	1.13062e+06	424542	432683
451	26035	17412	15535	11025	8713																																						107	4.90258e+07	3.73419e+06	3.79876e+06	1.44747e+06	-180610	348184
461	26015	18425	15894	11530	8541																																						110	48279276	3.77974e+06	3.13546e+06	1.08663e+06	-807491	324702
471	25690	18439	14590	11562	9081																																						113	4.91502e+07	3.94053e+06	3.76115e+06	1.13182e+06	-58261.7	392208
481	27363	17924	15295	12397	10077																																						116	4.93443e+07	3.66903e+06	3536680	1.28978e+06	-387067	331994
491	24353	19590	15548	11442	9658																																						119	4.94103e+07	3.82777e+06	3.55055e+06	1.4659e+06	-91933.7	73474.9
501	26596	19379	15051	10415	9186																																						122	4.91496e+07	3.54593e+06	3.39845e+06	1.06793e+06	-1.00123e+06	488364
511	27260	19746	16286	11022	9443																																						125	4.99916e+07	3.68741e+06	4.19636e+06	1.97148e+06	-11814	332734
521	26541	21295	16601	11487	8513																																						128	50113332	3.71491e+06	3.81774e+06	1.27012e+06	-185168	360343
531	26729	18106	16362	11270	9307																																						131	49902248	3.85106e+06	3.95275e+06	2.09669e+06	-613457	426525
541	26916	18693	16836	12115	9869																																						134	5.01219e+07	3.93837e+06	5.07087e+06	2.19501e+06	195145	508410
551	28261	20975	16522	11754	9259																																						137	5.04143e+07	3.44075e+06	4.46008e+06	1.83556e+06	-296175	327113
561	28004	20654	16839	12175	9313																																						140	51009414	3.74218e+06	5389813	1.83534e+06	304080	457484
571	27519	20165	16009	11632	10290																																						143	4.99786e+07	4.12089e+06	4.72595e+06	2.31012e+06	-158607	196772
581	29349	20605	16459	11876	10188																																						146	5.03287e+07	4.0443e+06	4.39069e+06	1.83635e+06	-485473	659453
591	29750	20527	16621	12309	9929																																						149	5.06408e+07	4.00465e+06	5.06604e+06	2.08826e+06	126626	349270
601	31036	22540	16045	12575	9477																																						152	5.06814e+07	3.833e+06	5.43171e+06	2.38942e+06	56759.7	306246
611	29256	21972	16992	12003	9175																																						155	50505245	3.7012e+06	4.78633e+06	1.75471e+06	-516855	381827
621	28304	21594	16471	12959	10135																																						158	5.06092e+07	4.00116e+06	5.26926e+06	2.14059e+06	-344963	461658
631	30634	19468	17883	12451	10729																																						161	50707274	3.71532e+06	4.86814e+06	2.19844e+06	-432015	870597
641	30703	21407	17789	12216	9910																																						164	5.009e+07	3.90602e+06	5.32389e+06	2.78014e+06	-791729	389332
651	30216	22500	16667	13327	9303																																						167	5.13506e+07	3.89522e+06	5794826	1.98203e+06	105090	249969
661	30485	22436	17278	12501	10434
671	32149	21850	18956	13059	9749
681	32131	22879	17856	12771	9721
691	31072	21783	18769	12847	9794
701	32494	22679	18164	12510	9696
711	33177	21677	19612	12201	10184
721	32585	22747	18562	12378	10257
731	32651	24137	18699	12591	8498
741	34702	22819	19134	12531	10625
751	34203	25064	18433	13280	9481
761	33444	23718	19691	13808	10154
771	33067	23364	18932	12932	9890
781	34372	24020	20050	12873	10284
791	35571	24135	19161	13634	9795
801	35276	25520	19406	13628	10818
811	33891	24414	18048	13662	10311
821	34047	24936	21361	13386	10338
831	36133	24451	20506	12946	9714
841	35333	26774	19456	13402	11098
851	35745	26272	18625	13519	9319
861	36214	26232	20600	12543	10309
871	39241	26943	20087	13888	11008
881	37021	27406	20582	12844	9436
891	38261	27267	19833	12653	10911
901	37863	27283	19381	14014	10468
911	37979	26034	20392	14095	10812
921	38237	26021	20492	13242	9976
931	38376	25753	20126	13021	10176
941	38892	26233	20902	13354	10141
951	40118	28266	21418	13807	10015
961	39996	27496	19873	13487	10019
971	40417	27819	20906	13587	10313
981	40141	25345	20677	13885	9691
991	41139	27340	21447	14488	10939
1001	41525	27176	20813	15206	10680
1011	39161	27024	19212	14070	10109
1021	40289	28892	22169	15362	11179
1031	40925	27330	22456	14252	9948
1041	41772	28406	19728	13062	10510
1051	42171	27747	21320	12784	9822
1061	40922	29387	21016	14934	9757
1071	44391	28401	21304	14508	10771
1081	42895	27990	20760	14710	10578
1091	43956	28205	22339	14470	10495
1101	43170	29364	22049	13577	10241
1111	42885	30127	20969	13534	10575
1121	42611	29140	22105	14700	10357
1131	44270	29540	21507	13447	10262
1141	42277	30641	21446	14545	9852
1151	42097	29909	22648	13960	9952
1161	43778	29201	21740	13812	10125
1171	44596	30309	21494	14067	9211
1181	45665	30874	20408	14135	9787
1191	44253	29420	21087	13579	9673
1201	46008	29959	21416	14401	9702
1211	46277	30008	22160	13964	10242
1221	44668	31748	22137	14004	9331
1231	45791	31776	22037	14449	9682
1241	46415	31858	21418	15721	9461
1251	42774	32024	22186	14199	10194
1261	46386	31188	22117	13917	9557
1271	48098	31548	22502	13943	10324
1281	47568	30566	22256	14343	9573
1291	45274	30957	22641	14255	10280
1301	48700	31618	22764	14412	9529
1311	45535	33102	20809	13899	9354
1321	47665	31787	21337	14598	9790
1331	48362	32353	20576	13717	9295
1341	47336	31744	20898	14186	9536
1351	47126	32279	22384	13919	10572
1361	47244	32043	22257	14745	9569
1371	47045	32147	21827	14260	9703
1381	49400	32500	22944	14047	9343
1391	48045	30960	22460	13880	8758
1401	48774	31454	21976	16192	9425
1411	48194	32443	21538	14840	9876
1421	49975	33230	21995	13318	8994
1431	47328	34565	23281	14284	9248
1441	49820	32652	22796	14068	8846
1451	49172	32190	22464	13843	8946
1461	48523	33827	24014	14111	8939
1471	51939	33108	22402	13928	9598
1481	48302	32537	22148	15460	8475
1491	53199	33060	21791	13818	9078
1501	48313	32751	22559	14412	8456
1511	49908	33859	24139	14587	9035
1521	49793	33600	22480	14555	8172
1531	50400	34352	23398	14617	8695
1541	51028	34194	22817	14357	9253
1551	49218	33548	23171	14250	9135
1561	48541	33120	23452	14498	8448
1571	50250	35036	22498	14409	9046
1581	51212	33677	22334	14021	9063
1591	51675	33625	22875	13919	8998
1601	53415	34606	23649	14153	9172
1611	50623	34445	22222	13893	8466
1621	51903	35505	23492	15558	7728
1631	51750	35438	22404	14962	8070
1641	52514	34858	23034	14959	7955
1651	52411	35030	23694	14730	7792
1661	52396	34901	22500	14678	8839
1671	53584	35145	23314	15576	8172
1681	52667	35407	23391	13982	7688
1691	51692	35997	23863	14928	7960
1701	53489	33271	22161	15532	8950
1711	54827	34848	24347	15006	8734
1721	52970	34338	24771	16217	7794
1731	52468	35294	22662	14594	8135
1741	53753	35783	23490	13850	8704
1751	53666	34606	22823	15324	9101
1761	52889	32926	24328	13436	7545
1771	53043	34523	23360	14675	9076
1781	53222	36561	23730	14656	8190
1791	55184	35866	23866	15003	7557
1801	53043	36694	23964	14191	8939
1811	53966	35673	23046	14956	8105
1821	53599	35443	23627	14591	7630
1831	54853	35088	23666	15729	8603
1841	54661	36319	23303	15218	8348
1851	54103	34602	23459	13939	8114
1861	54122	36209	24395	15155	8084
1871	55509	34666	23245	13934	7683
1881	55303	37578	24809	14930	7914
1891	54813	36963	22809	15318	7919
1901	54811	37234	23189	15104	7440
1911	54949	35540	24413	15849	8033
1921	53052	35064	23543	15520	8190
1931	54664	36603	24959	15671	8093
1941	55542	37026	23330	14286	7575
1951	55543	35342	23536	14468	8441
1961	53713	38876	23980	14956	7904
1971	54007	37456	24250	15777	7703
1981	56766	35811	24271	14553	8136
1991	56286	36255	25463	13995	8522
2001	56392	37520	23611	15250	7846
2011	55178	38172	24034	15605	8274
2021	57454	37300	24865	15938	7835
2031	57806	35196	24249	15189	7250
2041	56552	36609	24909	16949	8336
2051	57145	37987	25821	15500	8276
2061	58288	37426	24048	14724	7671
2071	56405	37841	23156	15670	7923
2081	56717	37668	24895	14869	7452
2091	58345	37343	24071	15564	7977
2101	58206	36287	23520	15125	7829
2111	57518	37251	24086	15646	7912
2121	55436	38197	23345	14501	7744
2131	56520	37687	23960	15317	8204
2141	55945	37110	23443	16404	7874
2151	58000	36559	23064	15559	8156
2161	59052	36261	24593	15859	7820
2171	55793	38823	23734	15862	8539
2181	55021	38161	23434	14678	8291
2191	57014	37558	23274	16383	7720
2201	58628	36401	23776	15058	7440
2211	56662	38579	23906	15260	8254
2221	60250	37309	25218	14570	8950
2231	58316	36980	23983	15603	7644
2241	58372	36767	23924	15395	7693
2251	58449	37248	24133	13919	8375
2261	59308	36915	23666	15045	7487
2271	57715	36437	25969	15564	8175
2281	56509	38362	24802	15314	8064
2291	57244	36818	23550	15289	6920
2301	58007	39681	22640	14887	7388
2311	58067	37829	23301	14055	8302
2321	57753	37149	24781	14494	8050
2331	55734	38478	23676	15381	8126
2341	58272	38397	25355	14573	8514
2351	60291	38781	24221	15442	8007
2361	59431	38393	23279	14934	8432
2371	58291	38752	24019	15471	7661
2381	57989	38849	24909	15766	8115
2391	59221	36898	24495	15596	8575
