# Supplementary material for: Regulation of mRNA translation by a photoriboswitch
Source: eLife. 2020 Feb 13;9:e51737. doi: 10.7554/eLife.51737 (PMC7051177; doi:10.7554/eLife.51737)
Supplement: Figure 3—figure supplement 1—source data 1. [file elife-51737-fig3-figsupp1-data1.xlsx]

## Sheet: Figure 3–figure supplement 1
Figure 3–figure supplement 1
	Step		Slope	Error
	no rNTPs		1e-05	0
	rNTPs		7.63	0.421177
	11 µM amino-tSS		0.32	0.043399
	342 nm		0.87	0.037538
	372 nm		0.43	0.054477
	342 nm		0.68	0.049196
	372 nm		0.22	0.064682
	342 nm		0.53	0.058327
	372 nm		0.39	0.050563
