# Supplementary material for: Regulation of mRNA translation by a photoriboswitch
Source: eLife. 2020 Feb 13;9:e51737. doi: 10.7554/eLife.51737 (PMC7051177; doi:10.7554/eLife.51737)
Supplement: Figure 3—figure supplement 2—source data 1. [file elife-51737-fig3-figsupp2-data1.xlsx]

## Sheet: Figure 3–figure supplement 2
Figure 3–figure supplement 2
	amino-tSS	342 nm	372 nm
	43.109	1453.2	1025.9
	238.61	1950.9	1132.8
