# Supplementary material for: Regulation of mRNA translation by a photoriboswitch
Source: eLife. 2020 Feb 13;9:e51737. doi: 10.7554/eLife.51737 (PMC7051177; doi:10.7554/eLife.51737)
Supplement: Figure 3—figure supplement 3—source data 1. [file elife-51737-fig3-figsupp3-data1.xlsx]

## Sheet: Figure 3–figure supplement 3
Figure 3–figure supplement 3
	Time	15 µM tSS exposed to 342 nm light		15 µM tSS exposed to 500 nm light		15 µM tSS ctrl - covered
	0	17	15	22	13	23	17
	2	18.6667	18.6667	13.3333	20.6667	24	19.6667
	4	23.3333	20	20.3333	14.6667	18.6667	19.6667
	6	26	17.6667	19	19.6667	21	22.3333
	8	22.3333	21	24.6667	17	19	24.6667
	10	20	22	22.3333	21.6667	18	23.6667
	12	27	19.3333	17	25	29	16
	14	18.6667	26.6667	19.6667	22.3333	25.3333	22
	18	34	27	21	21	32	27
	20	25	25	21	19.6667	24.3333	22
	22	30.25	30.5	20.75	20	29.5	23
	24	35.3333	29	23	22.6667	24.6667	24.3333
	26	36.3333	26.3333	18.6667	24	29.3333	38
	28	40	43.3333	21.6667	22.3333	23.3333	33.6667
	30	57.6667	48	21.6667	27.3333	32.6667	40
	32	77	56.3333	22	21.3333	31.3333	33.3333
	34	84.3333	77	29.6667	24.3333	42.6667	43.3333
	36	96.3333	89	32.6667	24.3333	47	66.6667
	38	119	123.333	20.3333	30.3333	59	61.3333
	40	159	134.333	39	28	71	68.3333
