# Supplementary material for: Regulation of mRNA translation by a photoriboswitch
Source: eLife. 2020 Feb 13;9:e51737. doi: 10.7554/eLife.51737 (PMC7051177; doi:10.7554/eLife.51737)
Supplement: Figure 3—figure supplement 4—source data 1. [file elife-51737-fig3-figsupp4-data1.xlsx]

## Sheet: Sheet1
	Figure 3–Figure Supplement 4
			G69C unexposed				G69C exposed to 342 nm				G69C exposed to 342 nm & 390 nm
		before	0.636364	1.09091	1	1.27273	1.09091	0.727273	0.909091	1.18182	1	1	0.909091	0.818182
		after 342 nm	1.11111	1.02778	0.944444	0.916667	1.16667	1.05556	0.777778	1.02778	1.05556	1	0.916667	1.02778
		after 390 nm	1.26431	1.08992	0.850136	0.79564	1.01362	1.18801	0.643052	1.04632	0.926431	1.02452	0.882834	0.817439
