# Supplementary material for: Regulation of mRNA translation by a photoriboswitch
Source: eLife. 2020 Feb 13;9:e51737. doi: 10.7554/eLife.51737 (PMC7051177; doi:10.7554/eLife.51737)
Supplement: Figure 3—source data 1. [file elife-51737-fig3-data1.xls]

## Sheet: Figure 3
Figure 3a										Figure 3b								Figure 3c									Figure 3d
tSS (µM)	1 millisecond									Exposure Time (s)								cSS (µM)									Exposure Time (s)
0	1.02	1	0.997	1														0.0001	1	1.03	1.02	0.949
5	1.21	1.14	1.07	1.21						0.0005	1.57	1.37	1.38	1.45				5	0.881	0.929	0.841						0.001	0.646	0.703	0.665	0.7
10	1.21	1.13	1.06	1.06	1.35484	1.46032	1.92079			0.001	1.06	1.35484	1.46032	1.92079	1.21	1.13	1.06	10	0.789	0.956	0.852	0.821	0.82	0.785			0.0125	0.681	0.674	0.729
15	1.13	1.16	1.23	1.21						0.0125	0.928571	1.17204	1.18518	1.54455				12	0.695	0.767	0.791	0.812	0.807	0.827			0.15	0.693	0.678	0.709	0.751
										0.15	0.919643	1.09677	1.31217	1.09901				15	0.679	0.738	0.719	0.841					1	0.679	0.738	0.719	0.841
										1	1.02679	1.35484	1.12169	1.07921
