# Supplementary figures and images for: Regulation of mRNA translation by a photoriboswitch
Source: eLife journal article supplement (doi:10.7554/elife.51737), 2020-02-13

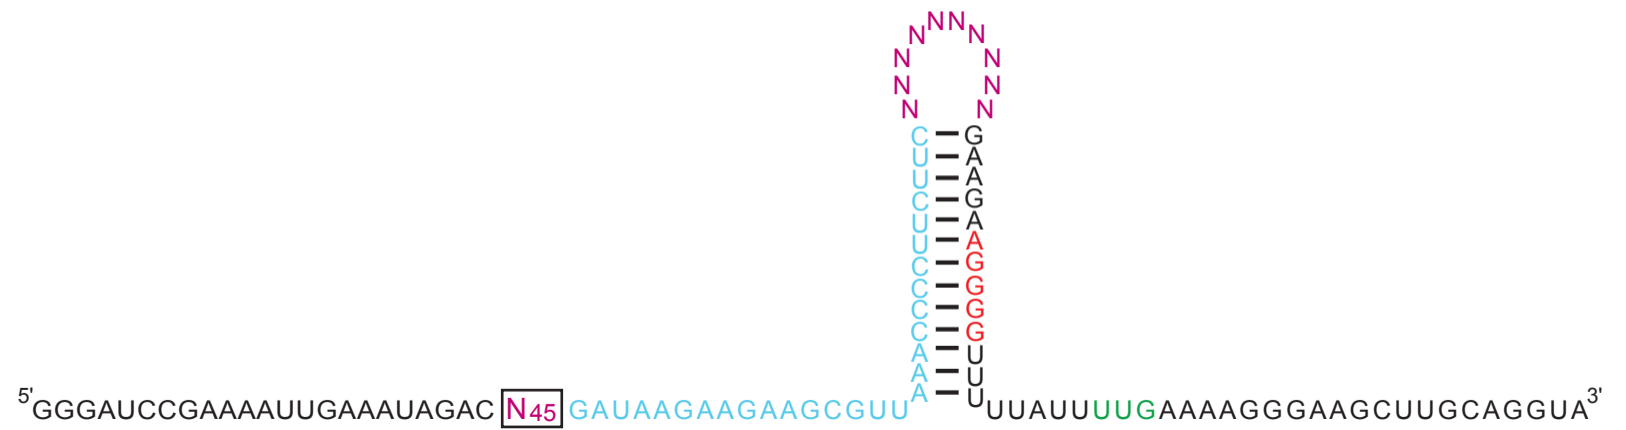

Supplement: supp [file elife_poa_e51737_Figure_1_figure_supplement_1.pdf › elife_poa_e51737_Figure_1_figure_supplement_1.pdf]

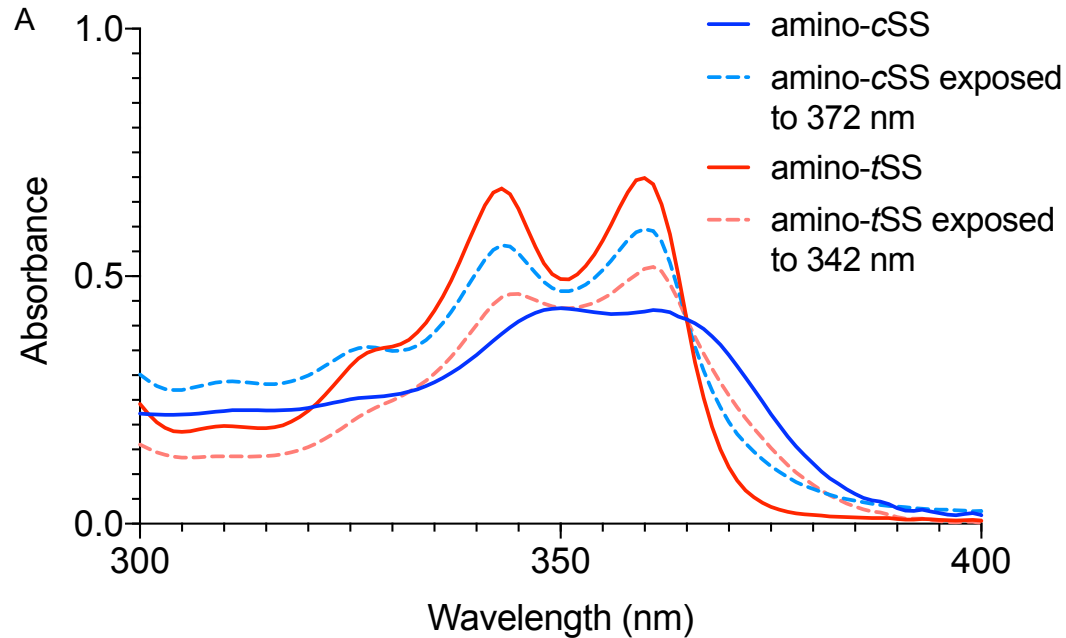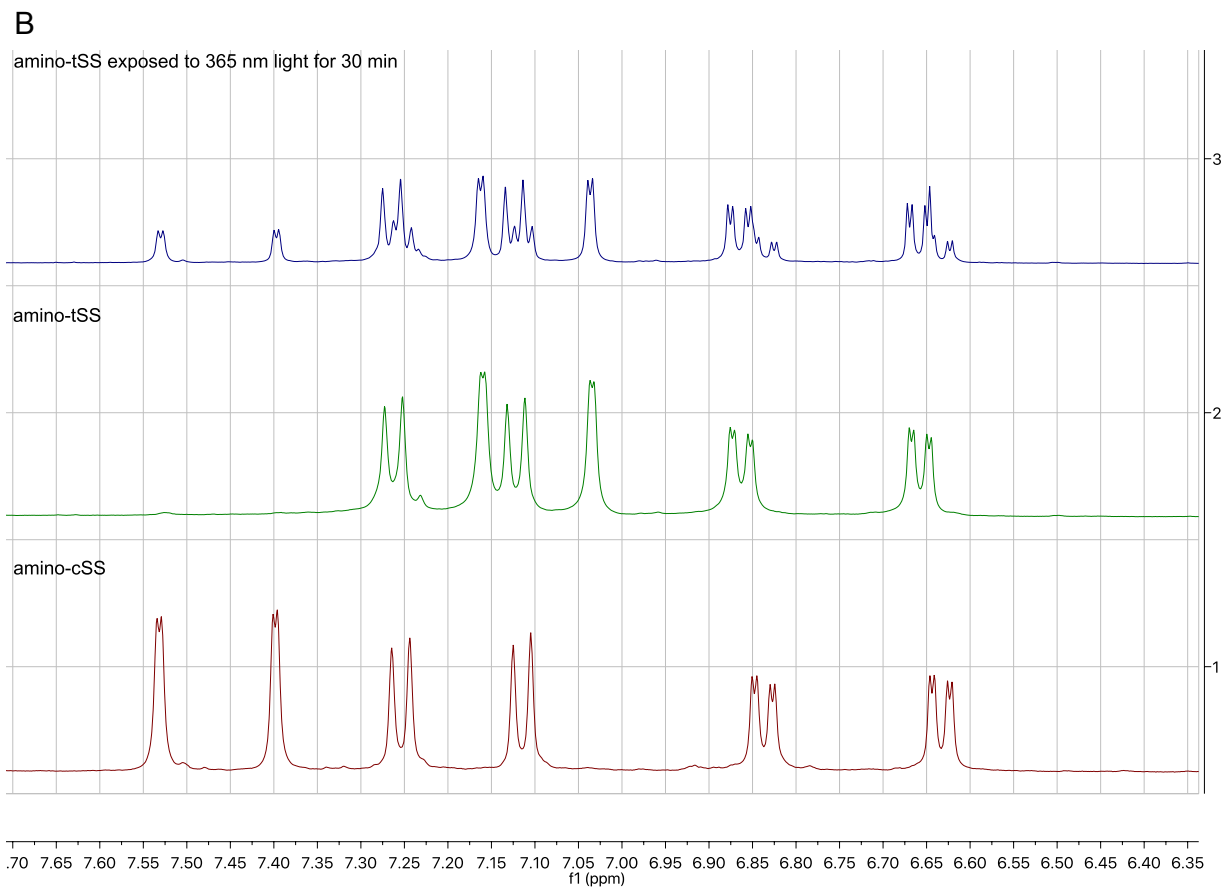

$^{13}\text{C}$  NMR, *t*SS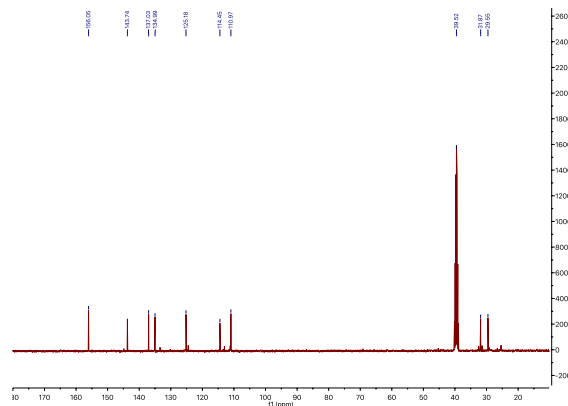 $^{13}\text{C}$  NMR, amino-*t*SS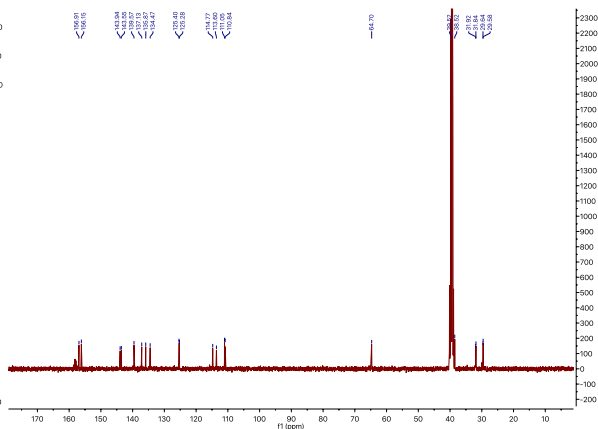 $^{13}\text{C}$  NMR, amino-cSS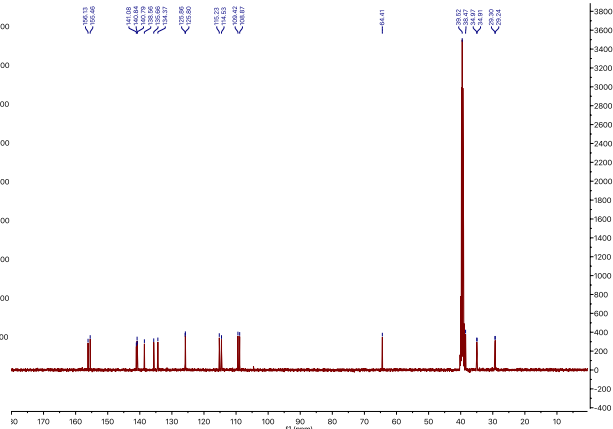

D

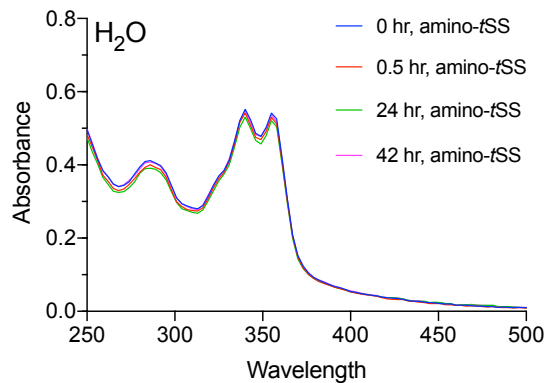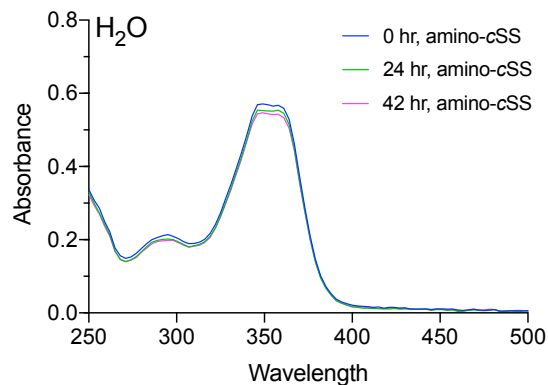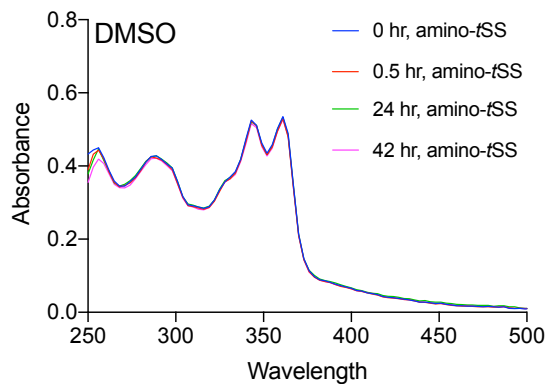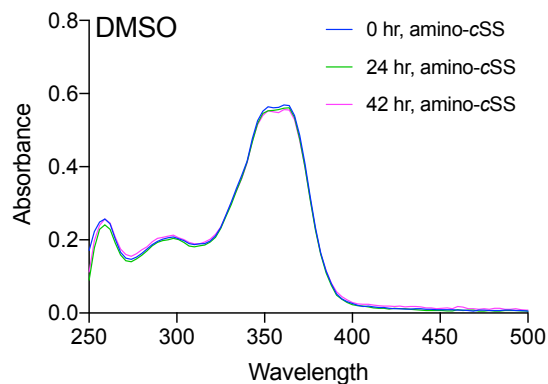

Supplement: supp [file elife_poa_e51737_Figure_1_figure_supplement_2.pdf › elife_poa_e51737_Figure_1_figure_supplement_2.pdf]

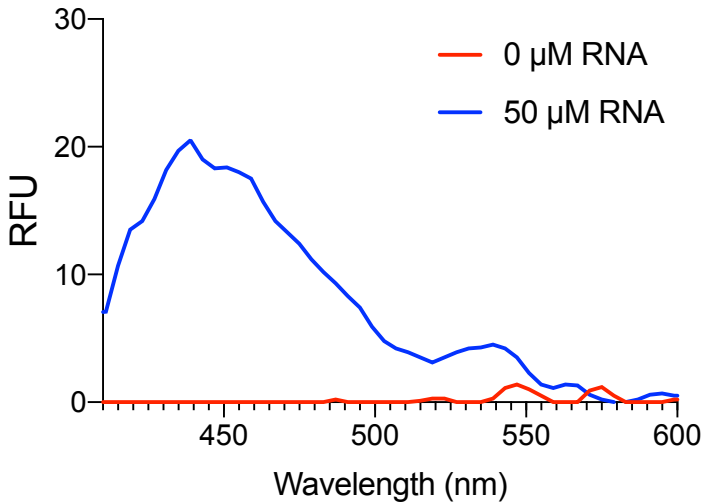

Supplement: supp [file elife_poa_e51737_Figure_1_figure_supplement_3.pdf › elife_poa_e51737_Figure_1_figure_supplement_3.pdf]

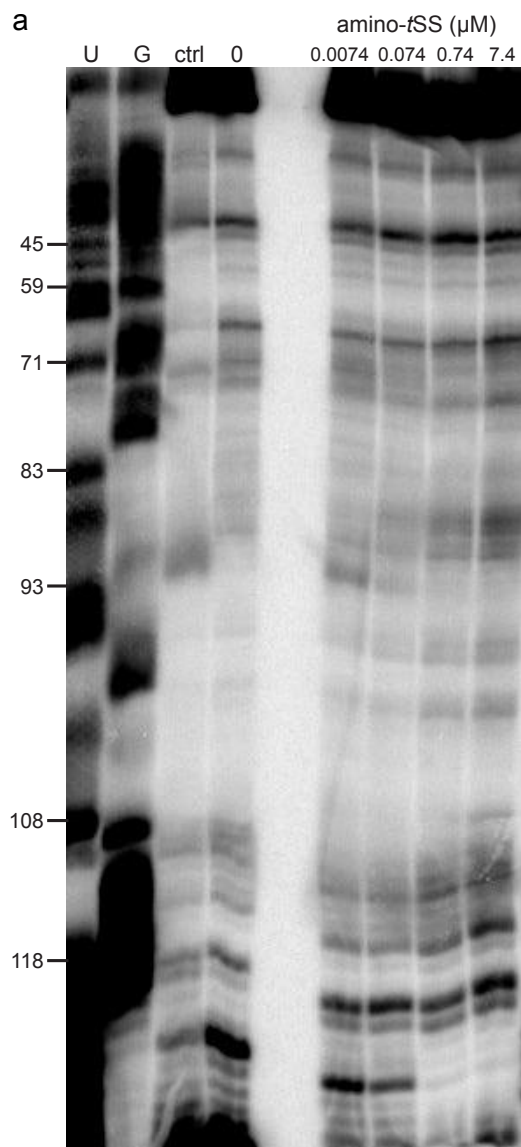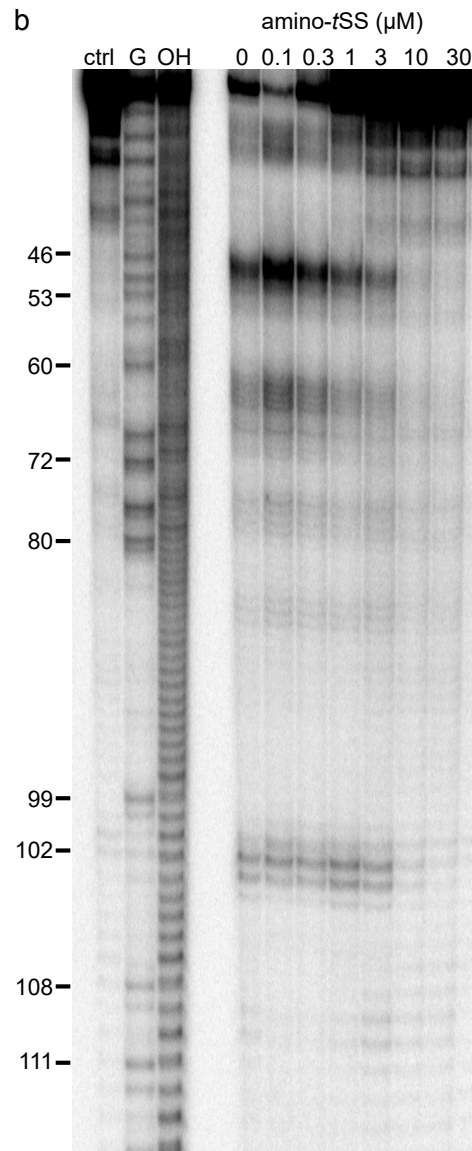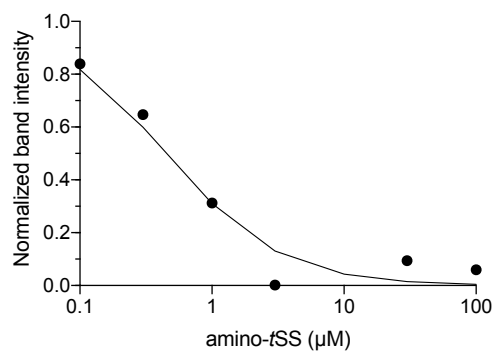

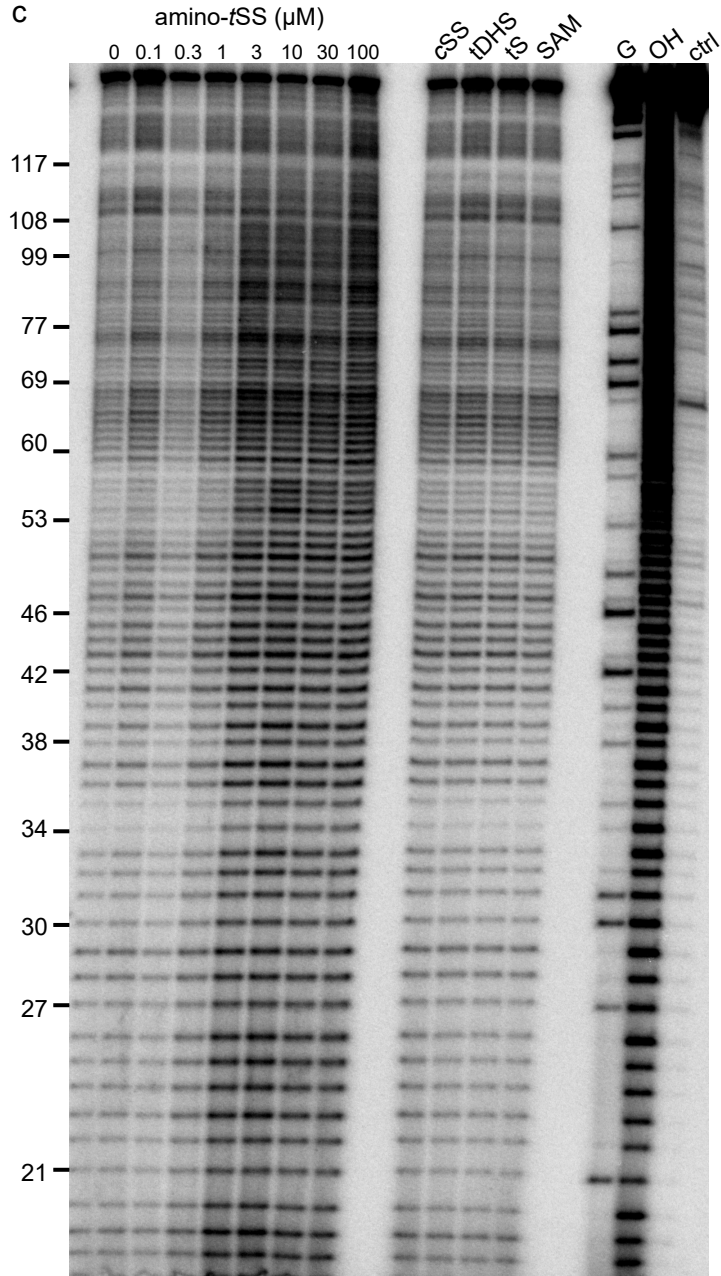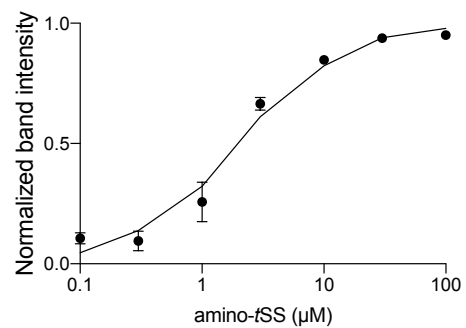

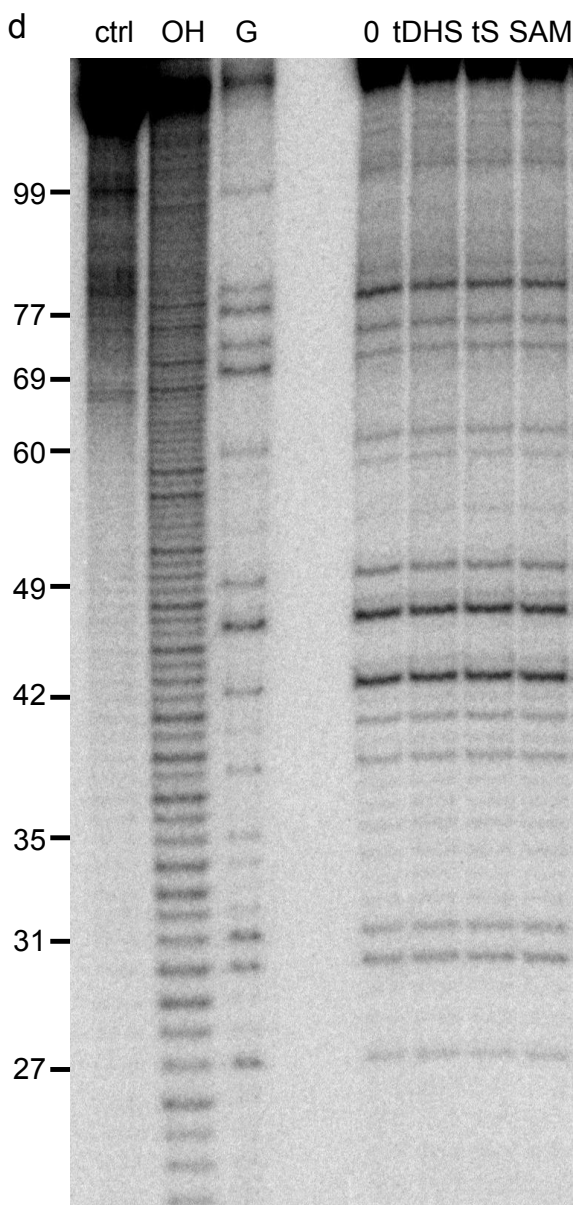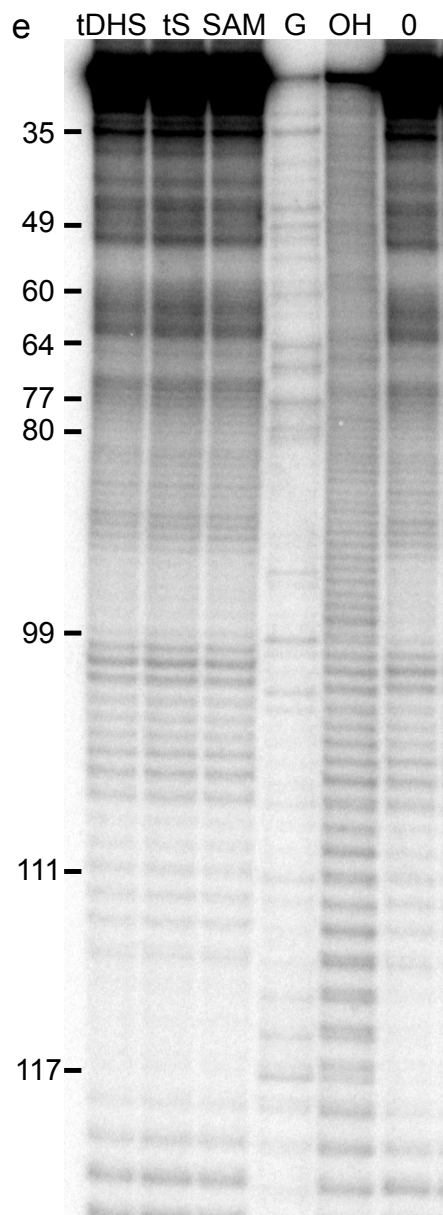

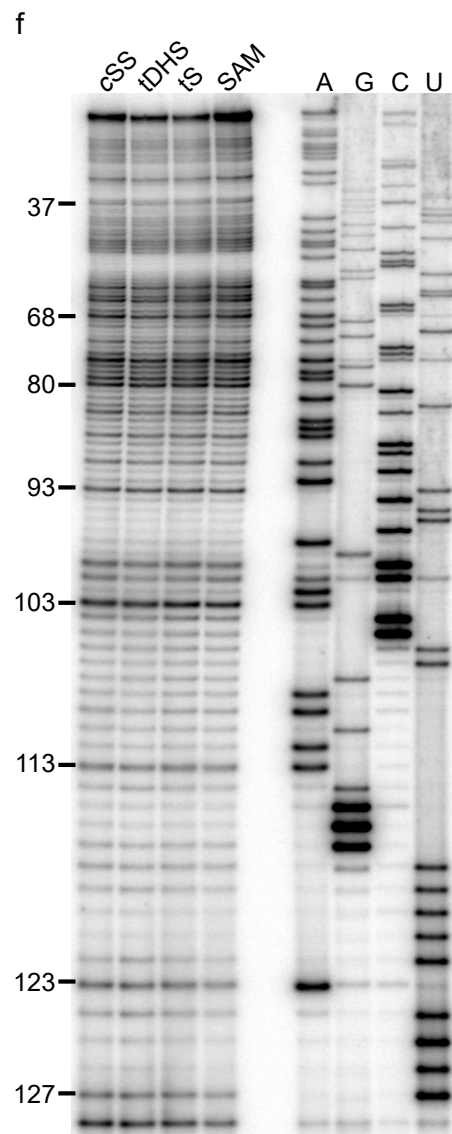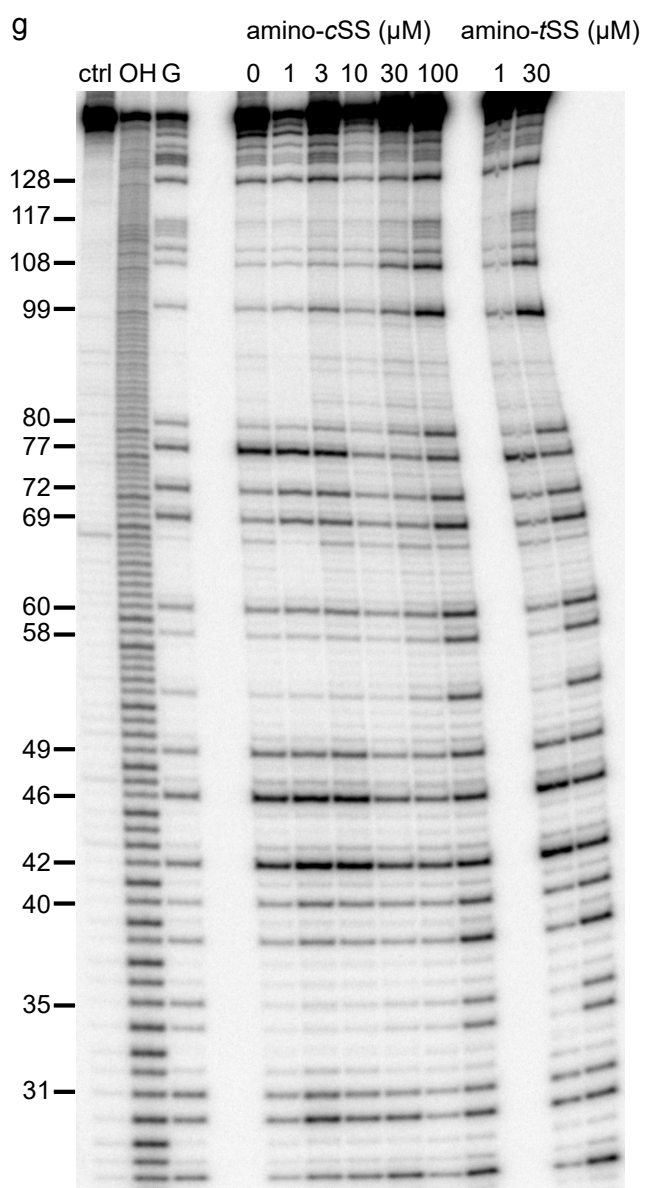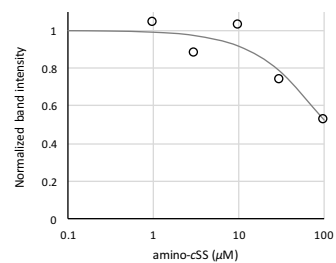

Supplement: supp [file elife_poa_e51737_Figure_1_figure_supplement_4.pdf › elife_poa_e51737_Figure_1_figure_supplement_4.pdf]

A

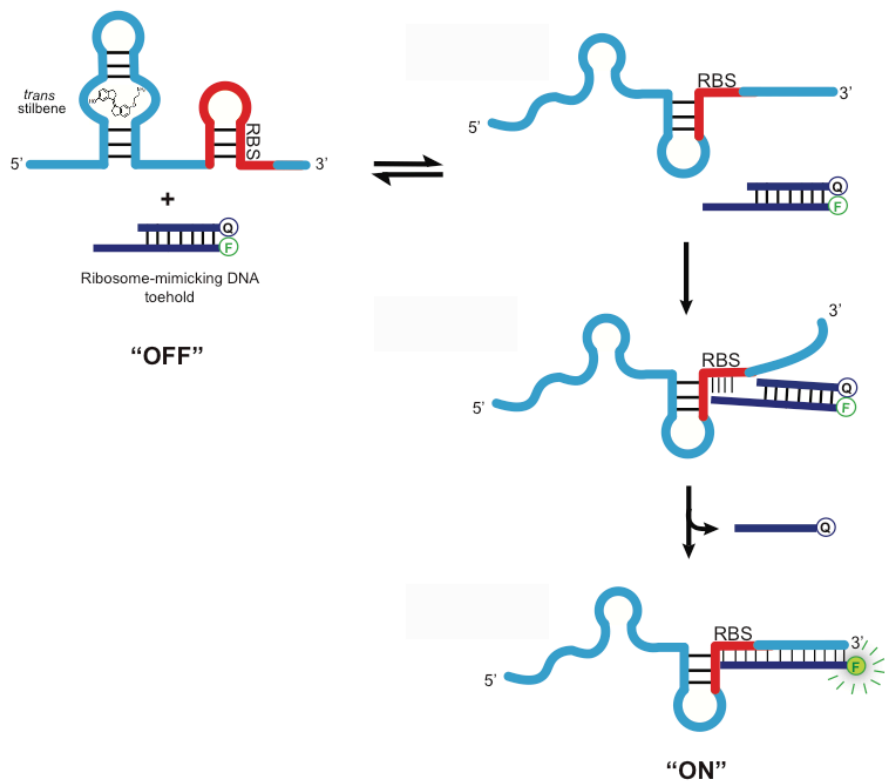

B

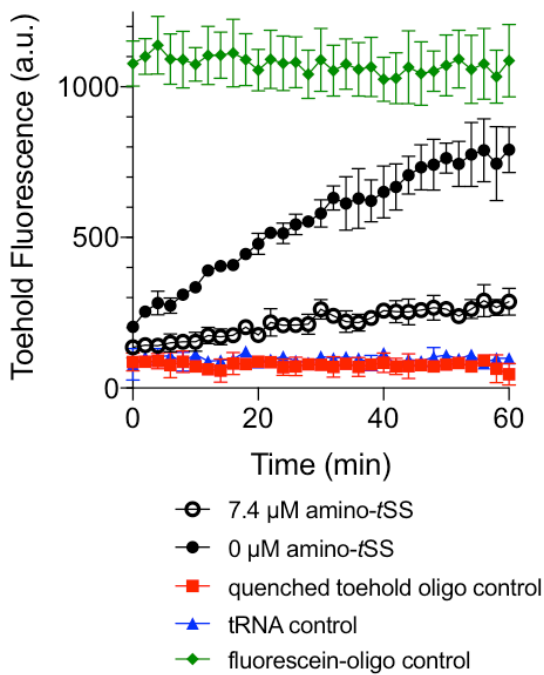

C

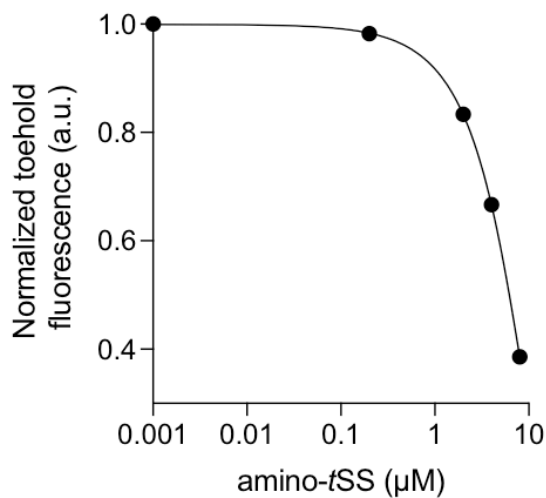

Supplement: supp [file elife_poa_e51737_Figure_2_figure_supplement_1.pdf › elife_poa_e51737_Figure_2_figure_supplement_1.pdf]

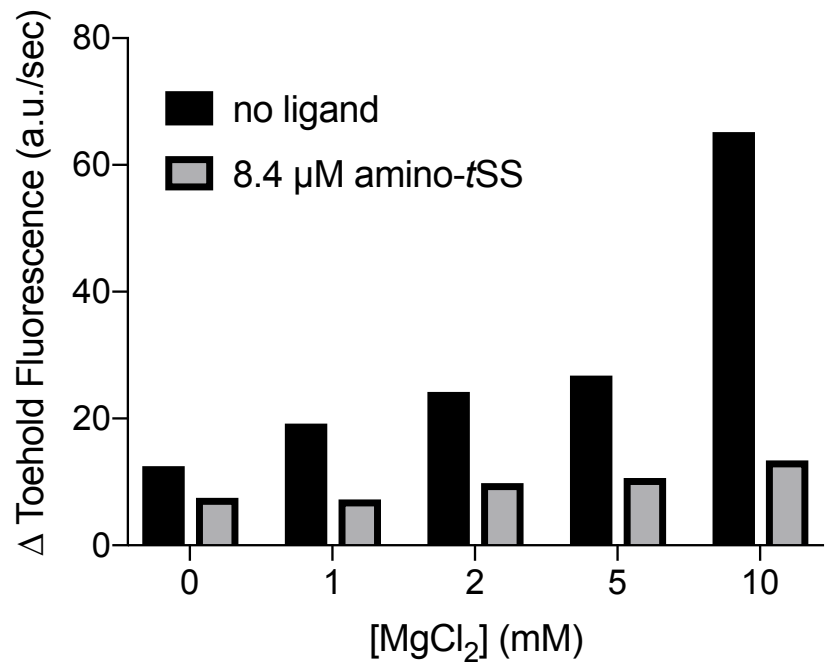

Supplement: supp [file elife_poa_e51737_Figure_2_figure_supplement_2.pdf › elife_poa_e51737_Figure_2_figure_supplement_2.pdf]

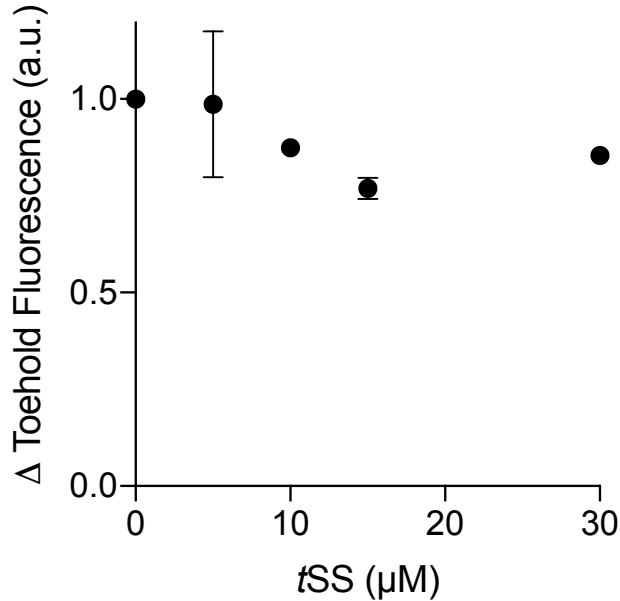

Supplement: supp [file elife_poa_e51737_Figure_2_figure_supplement_3.pdf › elife_poa_e51737_Figure_2_figure_supplement_3.pdf]

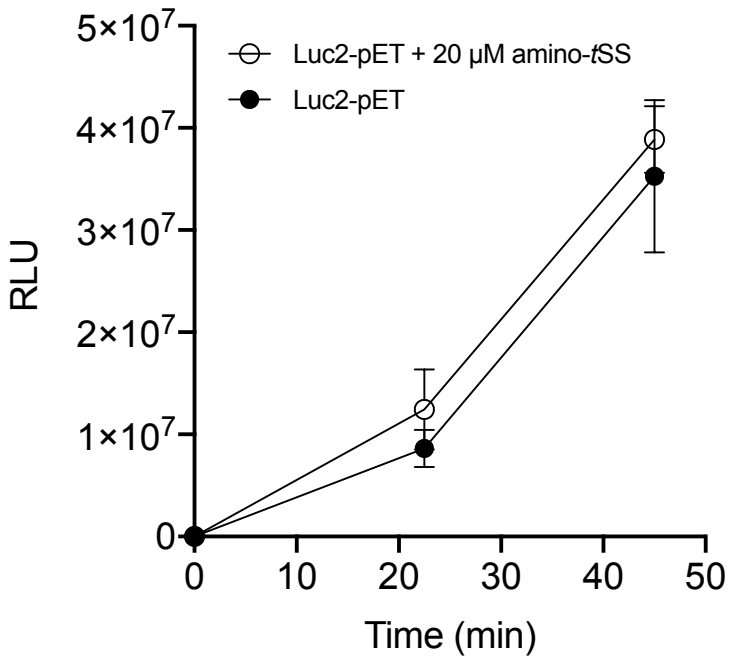

Supplement: supp [file elife_poa_e51737_Figure_2_figure_supplement_4.pdf › elife_poa_e51737_Figure_2_figure_supplement_4.pdf]

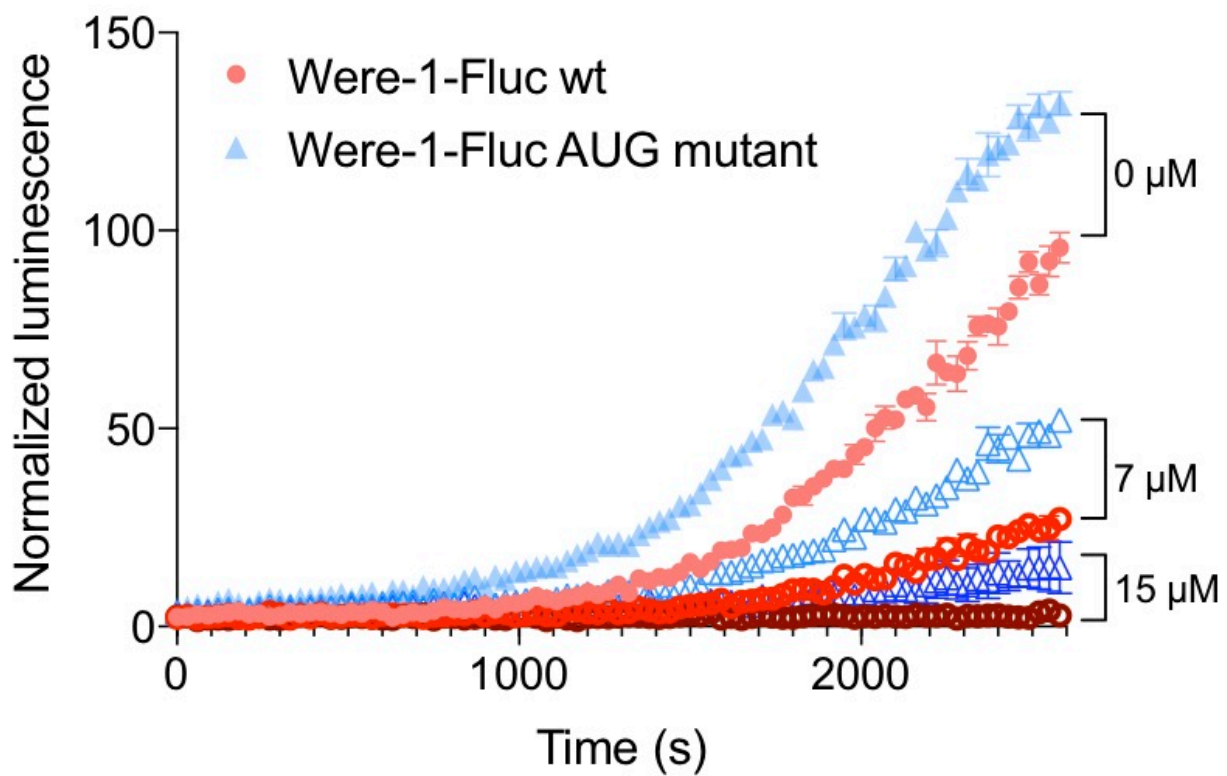

Supplement: supp [file elife_poa_e51737_Figure_2_figure_supplement_5.pdf › elife_poa_e51737_Figure_2_figure_supplement_5.pdf]

a

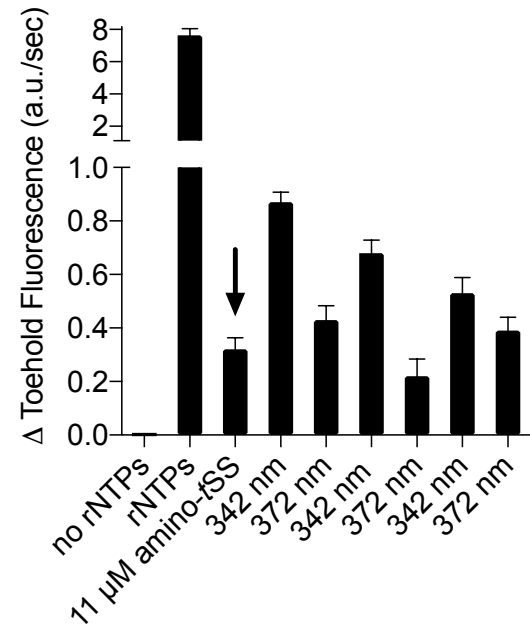

b

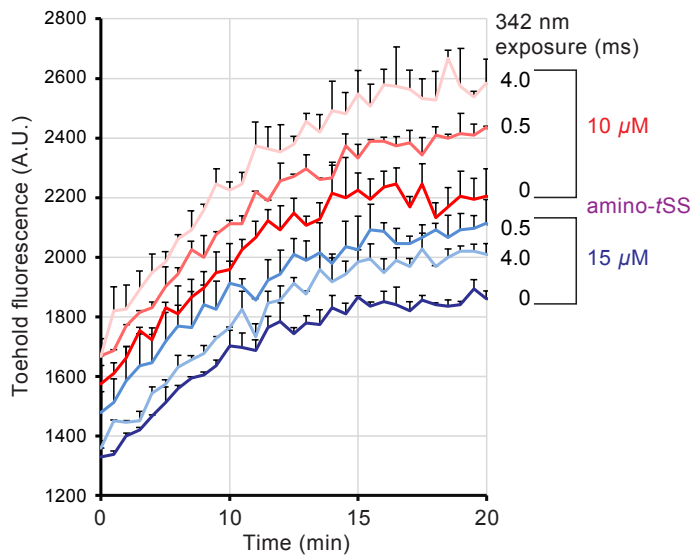

Supplement: supp [file elife_poa_e51737_Figure_3_figure_supplement_1.pdf › elife_poa_e51737_Figure_3_figure_supplement_1.pdf]

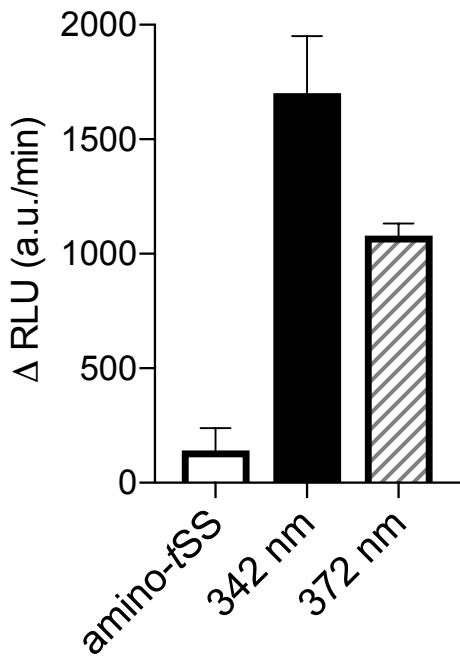

Supplement: supp [file elife_poa_e51737_Figure_3_figure_supplement_2.pdf › elife_poa_e51737_Figure_3_figure_supplement_2.pdf]

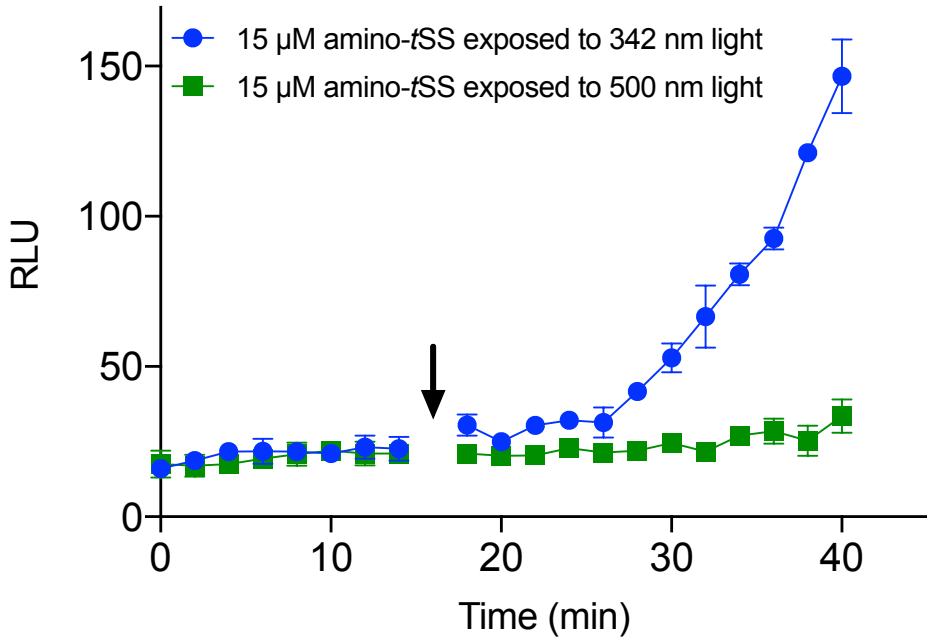

Supplement: supp [file elife_poa_e51737_Figure_3_figure_supplement_3.pdf › elife_poa_e51737_Figure_3_figure_supplement_3.pdf]

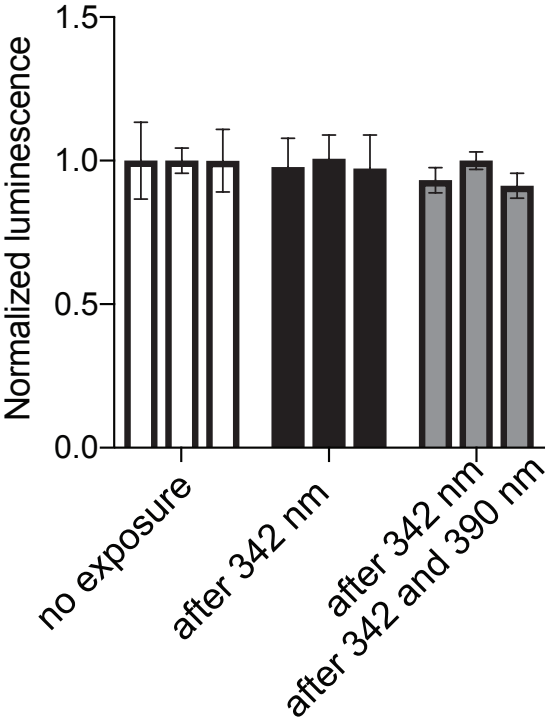

Supplement: supp [file elife_poa_e51737_Figure_3_figure_supplement_4.pdf › elife_poa_e51737_Figure_3_figure_supplement_4.pdf]
